# Supplementary material for: Retrieving monthly and interannual pH T on the East China Sea shelf using an artificial neural network: ANN-pH T -v1
Source: Copernicus journal article supplement (doi:10.5194/gmd-2019-236), 2019-10-28
Supplement: Supplementary file 1 [file gmd-2019-236-supplement.pdf]

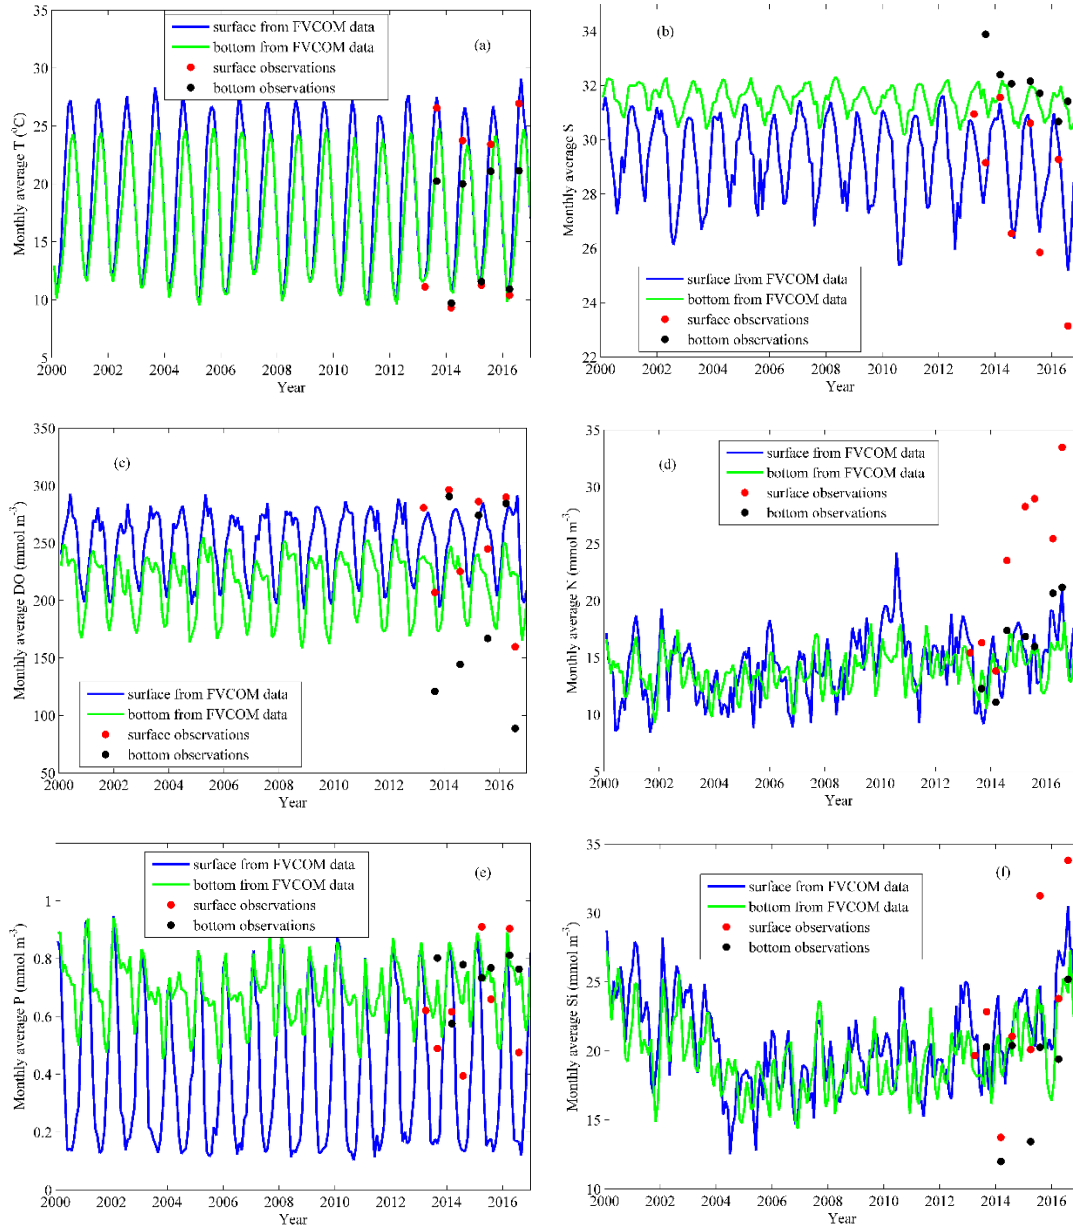

**Figure S1: Comparison of monthly-average environmental variables at the surface and bottom on the East China Sea shelf. Green and blue solid lines represent surface and bottom simulated data from the Changjiang Biology Finite-Volume Coastal Ocean Model, respectively; red and black points show surface and bottom observation data from 2013 to 2016, respectively. (a)-temperature; (b)-salinity; (c)-dissolved oxygen; (d)-nitrate; (e)-phosphate; (f)-silicate.**
