# Supplementary material for: Retrieving monthly and interannual pH T on the East China Sea shelf using an artificial neural network: ANN-pH T -v1
Source: Copernicus journal article supplement (doi:10.5194/gmd-2019-236), 2019-10-28
Supplement: Supplementary file [file gmd-2019-236-AC1-supplement.pdf]

# Our response to referee comment in the interactive discussion

Dear Referee, dear Editor,

We would like to thank you very much for your positive comment and constructive suggestion to our manuscript “*Retrieving monthly and interannual  $pH_T$  on the East China Sea shelf using an artificial neural network: ANN- $pH_T$ -v1*”.

In this document, we would like to provide our response to the referee comment posted by Richard Mills and to outline the corresponding changes to the manuscript. We will represent the referee comment in **bold** font, and our response in normal font. Quotations from the original manuscript will be in *italics*, changes as part of the manuscript revision will be highlighted as underlined. For the sake of clarity and brevity, we have omitted the introductory parts of the referee report (this omission is marked as [...]).

We hope that our response together with the revision of the manuscript sufficiently addresses the referee’s concerns.

Sincerely,

Xiaoshuang Li (on behalf of the author team)

## Referee comment by Richard Mills

[...] I came away from my reading of the paper with the following major questions/concerns which, if addressed, will greatly improve the quality of the paper:

1. **First, since the paper has been submitted to a model development journal, I would like to see more information on how and why the authors arrived at the particular form of the machine-learning model they used, and how this model performed against some other possible model architectures. The authors have used a feed-forward multilayer perceptron network with two hidden layers (with 40 neurons in the first layer and 16 in the second) and full connectivity between the layers. Why did the authors decide on two layers, and how did they choose the number of neurons in each layer? (They do state that they tried varying the number of neurons in each layer, but don’t give further details.) How did they choose the activation function? And why did they choose a neural network, instead of another approach such as k-nearest neighbors, random forest regression, or support vector regression? When I first started working in machine learning, around two decades ago, it would not have been expected for authors to try a variety of different types of models, as this would likely involve substantial code development effort, as well as possibly significant computational expense for training models. Today, however, it is easy to try many different models, as code provided in many easily obtained packages such as Scikit-learn or those provided by Matlab (the environment that the authors use for this study), and it is becoming the norm for papers presenting the development of machine-learning models to compare several types to determine the one that performs best for the chosen task. I would like to see some comparison against other models (some of the ones easily constructed using Matlab) to demonstrate that the ANN is the most appropriate choice.**

We thank the referee for the suggestion: the required details should, in fact, be provided to the reader. We will add, in the revised manuscript, the corresponding information (Why did the authors decide on two layers, and how did they choose the number of neurons in each layer? How did they choose the activation function? And why did they choose a neural network, instead of another approach such as k-nearest neighbors, random forest regression, or support vector regression?)—as follows II. 112-128 and 160-163 of the revised manuscript:

II. 112-128 of the revised manuscript

*In our study, calculations were done in the MathWorks Matlab environment, using the Deep Learning Toolbox.*

*Firstly, we compared the performance of one hidden layer and two hidden layers on independent validation data, the number of neurons varied from  $2^2$  to  $2^8$  for one hidden layer and fixed at four in the second hidden layer for two hidden layers (Fig. 4), the result of ten-fold cross-validation showed that the model with two hidden layers performed better as the number of*

neurons increased. Secondly, in order to choose suitable training techniques and activation functions of the ANN model with two hidden layers, three training functions (Gradient descent backpropagation (trainGD), Levenberg-Marquardt backpropagation (trainLM), Scaled conjugate gradient backpropagation (trainSCG)), which differ on how the weights are modified, and three transfer functions (Log-sigmoid transfer function (logsig), Hyperbolic tangent sigmoid transfer function (tansig); Positive linear transfer function (poslin)) were tested (Fig. 5). The output values of logsig, tansig and poslin are squashed into  $[0, 1]$ ,  $[-1, 1]$ , and  $[0, +\infty]$ , respectively (Fig. S1). The result demonstrated that as the number of neurons increased, the performances of trainGD and tansig became poor. Although there was no obvious difference between trainLM and trainSCG, here training technique trainSCG was selected and transfer function logsig was applied to two hidden layers considering the overall performance (Fig. 5). Thirdly, in the training phase of the ANN model, the number of neurons was tested, varying from 4 to 128 for two hidden layers (Table S1). It was found that the number of neurons was set to 40 in the first hidden layer and 16 in the second layer, the ANN model showed the best performance for both training data and independent validation data. Finally, different combinations of input variables were tested to choose the optimal architecture of the ANN model (Table 2). The result showed that the performance of the ANN model was optimal when longitude, latitude, month, T, S, DO, N, P and Si were used as input variables.

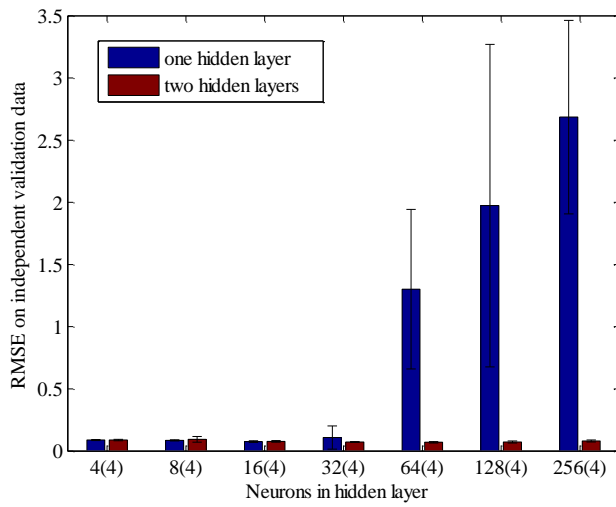

**Figure 4 (revised):** Comparison of the performance of one hidden layer and two hidden layers on independent validation data. The result displayed are the mean and standard deviation of ten-fold cross-validation for each number of neurons in the hidden layer. The number in parentheses presents the number of neurons in the second hidden layer for two hidden layers.

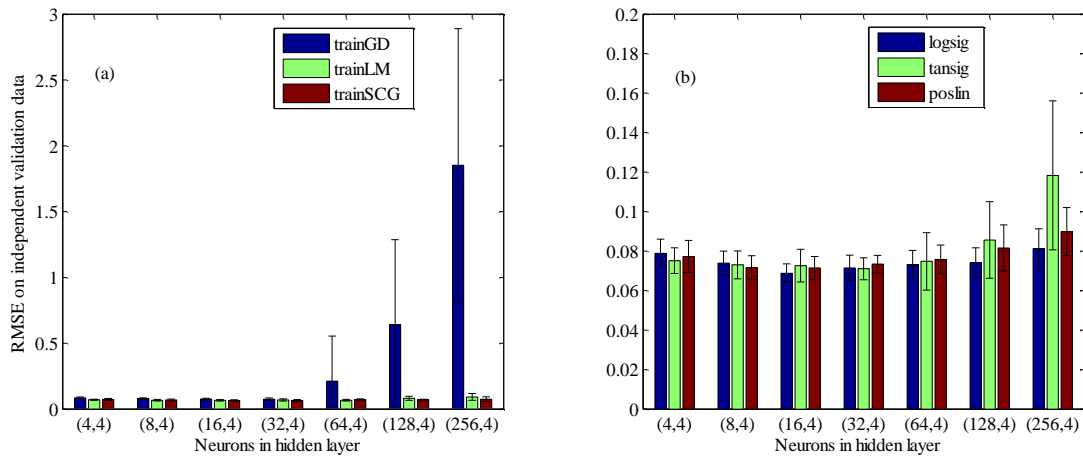

**Figure 5 (revised):** Comparison of the performance of different training functions and transfer functions on independent validation data. (a)-three training functions: Gradient descent backpropagation (trainGD), Levenberg-Marquardt backpropagation (trainLM), Scaled conjugate gradient backpropagation (trainSCG); (b) three transfer functions: Log-sigmoid transfer function (logsig), Hyperbolic tangent sigmoid transfer function (tansig); Positive linear transfer function (poslin). The result displayed are the mean and standard deviation of ten-fold cross-validation for each number of neurons in the hidden layer.

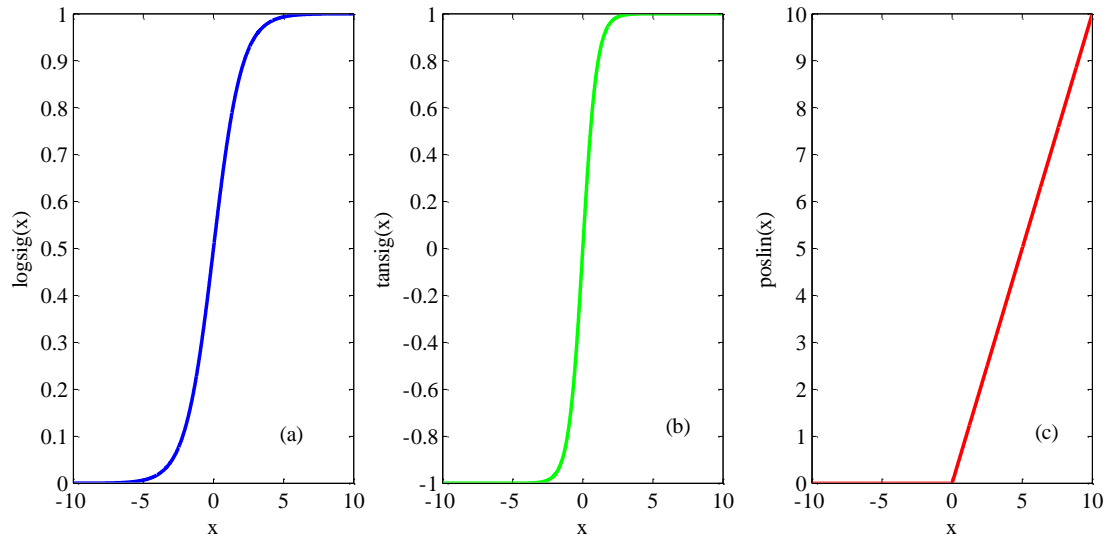

**Figure S1 (revised): Comparison of three transfer functions. (a)-Log-sigmoid transfer function (logsig); (b) Hyperbolic tangent sigmoid transfer function (tansig); (c)-Positive linear transfer function (poslin).**

**Table S1 (revised): The performance of different number of neurons for two hidden layers in the training step. Three statistics are the coefficient of determination ( $R^2$ ), the root mean squared error (RMSE), and the mean absolute error (MAE).**

| Model | Number of neurons |               | Training data |       |       | Independent validation data |       |       |
|-------|-------------------|---------------|---------------|-------|-------|-----------------------------|-------|-------|
|       | first hidden      | second hidden | $R^2$         | RMSE  | MAE   | $R^2$                       | RMSE  | MAE   |
| 1     | 4                 | 4             | 0.68          | 0.071 | 0.054 | 0.67                        | 0.072 | 0.057 |
| 2     | 8                 | 4             | 0.70          | 0.070 | 0.050 | 0.67                        | 0.069 | 0.050 |
| 3     | 16                | 4             | 0.76          | 0.062 | 0.045 | 0.76                        | 0.062 | 0.045 |
| 4     | 32                | 4             | 0.74          | 0.063 | 0.046 | 0.79                        | 0.062 | 0.048 |
| 5     | 40                | 4             | 0.76          | 0.062 | 0.044 | 0.76                        | 0.061 | 0.045 |
| 6     | 64                | 4             | 0.79          | 0.058 | 0.041 | 0.78                        | 0.056 | 0.043 |
| 7     | 128               | 4             | 0.76          | 0.062 | 0.045 | 0.74                        | 0.062 | 0.044 |
| 8     | 8                 | 8             | 0.73          | 0.065 | 0.047 | 0.73                        | 0.065 | 0.048 |
| 9     | 16                | 8             | 0.78          | 0.059 | 0.042 | 0.78                        | 0.058 | 0.044 |
| 10    | 32                | 8             | 0.78          | 0.059 | 0.042 | 0.83                        | 0.053 | 0.039 |
| 11    | 40                | 8             | 0.79          | 0.059 | 0.042 | 0.77                        | 0.055 | 0.040 |
| 12    | 64                | 8             | 0.77          | 0.061 | 0.044 | 0.76                        | 0.059 | 0.042 |
| 13    | 128               | 8             | 0.77          | 0.060 | 0.042 | 0.79                        | 0.059 | 0.043 |
| 14    | 16                | 16            | 0.79          | 0.057 | 0.041 | 0.85                        | 0.054 | 0.041 |
| 15    | 32                | 16            | 0.80          | 0.057 | 0.040 | 0.69                        | 0.059 | 0.043 |
| 16    | 40                | 16            | 0.82          | 0.054 | 0.039 | 0.81                        | 0.053 | 0.039 |
| 17    | 64                | 16            | 0.79          | 0.059 | 0.041 | 0.76                        | 0.057 | 0.040 |
| 18    | 128               | 16            | 0.79          | 0.058 | 0.040 | 0.78                        | 0.059 | 0.043 |
| 19    | 32                | 32            | 0.78          | 0.059 | 0.042 | 0.75                        | 0.058 | 0.039 |
| 20    | 40                | 32            | 0.79          | 0.058 | 0.041 | 0.79                        | 0.055 | 0.040 |
| 21    | 64                | 32            | 0.78          | 0.059 | 0.042 | 0.83                        | 0.052 | 0.040 |
| 22    | 128               | 32            | 0.79          | 0.058 | 0.041 | 0.79                        | 0.056 | 0.041 |
| 23    | 40                | 40            | 0.77          | 0.060 | 0.043 | 0.77                        | 0.060 | 0.044 |
| 24    | 64                | 40            | 0.79          | 0.058 | 0.042 | 0.75                        | 0.060 | 0.043 |
| 25    | 128               | 40            | 0.80          | 0.057 | 0.040 | 0.78                        | 0.057 | 0.042 |
| 26    | 64                | 64            | 0.78          | 0.060 | 0.042 | 0.78                        | 0.057 | 0.040 |
| 27    | 128               | 64            | 0.72          | 0.068 | 0.050 | 0.65                        | 0.067 | 0.048 |
| 28    | 128               | 128           | 0.72          | 0.067 | 0.049 | 0.65                        | 0.072 | 0.051 |

(Dai and Trenberth, 2002). As a reference, the performance of some empirical approaches, including MLR, multi-variate nonlinear regression (MNR), decision tree, random forest, and Support Vector Machine (SVM) regression, was shown in Table 3. Clearly, the ANN model showed better performance than other tested approaches using same input variables (Table 2, Model#10).

**Table 3 (revised): Model comparison between traditional empirical methods (MLR and MNR) and machine-learning based empirical methods (Decision tree, Random Forest, and SVM). The statistics was derived from confirmatory dataset (training data independent validation data) using input variables: T, S, DO, N, P, and Si. Note  $R^2$  statistics in our study was based on the calculation of coefficient of determination, therefore negative  $R^2$  could be derived if there were strong bias.**

| Model         | Kernel Function | Input variables    | RMSE  | $R^2$ | MAE   |
|---------------|-----------------|--------------------|-------|-------|-------|
| MLR           | -               | T, S, DO, N, P, Si | 0.078 | 0.56  | 0.062 |
| MNR           | -               | T, S, DO, N, P, Si | 0.060 | 0.74  | 0.047 |
| Decision Tree | Simple Tree     | T, S, DO, N, P, Si | 0.064 | 0.71  | 0.047 |
|               | Medium Tree     | T, S, DO, N, P, Si | 0.060 | 0.74  | 0.044 |
|               | Complex Tree    | T, S, DO, N, P, Si | 0.061 | 0.73  | 0.043 |
| Random Forest | Boosted Trees   | T, S, DO, N, P, Si | 0.340 | -7.51 | 0.339 |
|               | Bagged Trees    | T, S, DO, N, P, Si | 0.056 | 0.77  | 0.04  |
| SVM           | Linear          | T, S, DO, N, P, Si | 0.079 | 0.55  | 0.061 |
|               | Quadratic       | T, S, DO, N, P, Si | 0.061 | 0.73  | 0.046 |
|               | Cubic           | T, S, DO, N, P, Si | 0.060 | 0.74  | 0.043 |
|               | Fine Gaussian   | T, S, DO, N, P, Si | 0.064 | 0.70  | 0.042 |
|               | Medium Gaussian | T, S, DO, N, P, Si | 0.054 | 0.79  | 0.041 |
|               | Coarse Gaussian | T, S, DO, N, P, Si | 0.069 | 0.65  | 0.054 |

## Referee comment by Richard Mills

- Second, the authors do a good job of citing other papers in which authors have used similar ANN approaches for similar biogeochemical prediction tasks in marine waters, and compare the RMSE of their model with published values from other models. I think that the paper would be greatly improved if the authors could do a direct comparison. For instance, the authors cite the CANYON neural network model of Sauzède et al., 2017, which has been developed for the global ocean, but note that "coastal seas tend to show greater temporal and spatial variability than open oceans", which I believe is an argument for why they developed the model presented in their paper. I can easily imagine that the model presented here will outperform the CANYON model for prediction on the East China Sea shelf, but I think it would be interesting for the authors to demonstrate this: The CANYON model appears to be freely available online, and it would be interesting to see how much better a model trained specifically for the East China Sea shelf will outperform one developed for the global ocean.

We would like to thank the referee very much for his suggestion. We applied the CANYON model developed by Sauzède et al. (2017) to exploratory dataset, result showed that the ANN model presented here outperformed the CANYON model developed for the global ocean for predicting  $pH_T$  on the ECS shelf. We will add the corresponding information in the revised manuscript—as follows II. 185-192 of the revised manuscript:

Sauzède et al. (2017) developed a neural network method to estimate pH with RMSE of 0.02 in the global ocean. Here the CANYON model developed by Sauzède et al. (2017) was applied to exploratory dataset (Fig. 8b), showed a RMSE of 0.09 and MAE of 0.06. It demonstrated that the ANN model presented here outperformed the CANYON model developed for the global ocean for predicting  $pH_T$  on the ECS shelf, where carbon chemistry parameters are not only under the direct impact of Taiwan Warm Current and remote control of the Kuroshio water intrusion into the shelf but also significantly controlled by seasonal variations of the Changjiang discharge (e.g., Isobe and Matsuno, 2008; Chen et al., 2008; Chou et al., 2009). Taking into account the highly complex hydrographic, biological and chemical conditions, the accuracy of  $pH_T$  presented is promising.

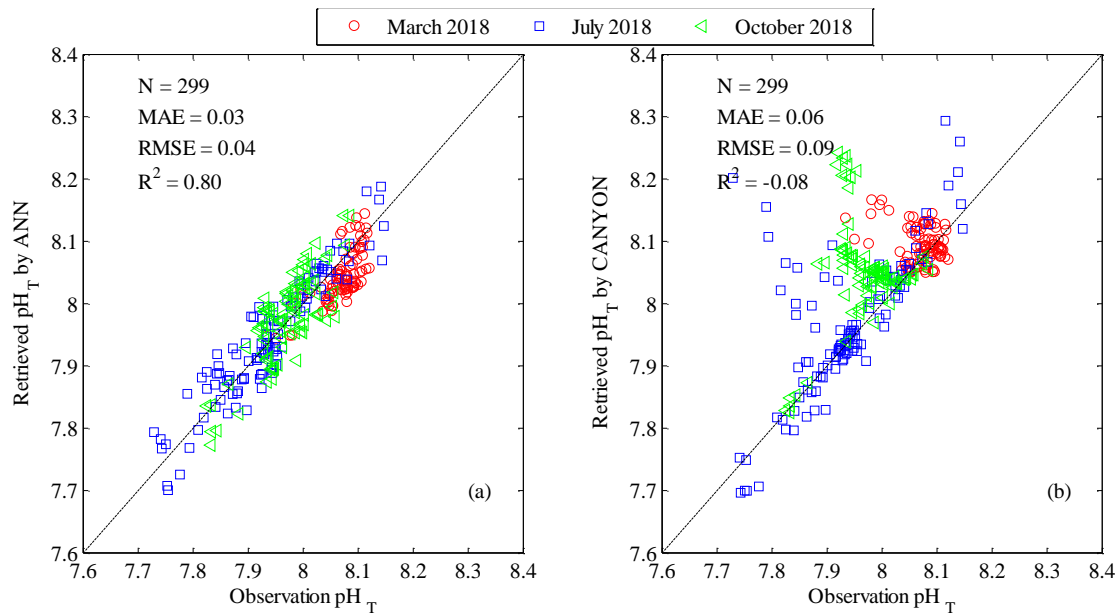

**Figure 8 (revised): Comparison of retrieved  $\text{pH}_T$  with corresponding observations for exploratory dataset. (a)- $\text{pH}_T$  retrieved by the ANN model vs observations; (b)- $\text{pH}_T$  retrieved by CANYON (Sauzède et al., 2017) vs observations. The red circles represent March 2018, the blue squares represent July 2018, the green triangles represent October 2018. The 1:1 line is shown in the plot as visual reference. Three statistics approaches used are the mean absolute error (MAE), the coefficient of determination ( $R^2$ ), and the root mean squared error (RMSE). N represents the number of data points.**

## Referee comment by Richard Mills

3. Finally, the authors perform an interesting study in which they use prognostic variables from the Changjiang Biology Finite-Volume Coastal Ocean Model (FVCOM) as input to their ANN model in order to recover the  $\text{pH}_T$ . I am not a marine biogeochemistry modeler, so perhaps I am missing something obvious, but I am guessing that mechanistic models like FVCOM can provide prognostic  $\text{pH}_T$ . Is this available from the FVCOM runs that were used, or could it be obtained using FVCOM, or ROMS, or another, similar model? If so, how would the prognostic  $\text{pH}_T$  from FVCOM (or similar) compare to the  $\text{pH}_T$  from the authors' own ANN model? And what is the motivation for using the ANN? Is it because it can potentially provide a more accurate  $\text{pH}_T$ , or because it can provide  $\text{pH}_T$  for situations in which it is not desirable to run a forward simulation or reanalysis to get the  $\text{pH}_T$ , or some other reason? This may be obvious to an marine biogeochemist, but I and many of the readers of GMD don't have this expertise. The motivation needs to be explained for the general GMD audience.

We fully agree with the referee. We will compare the prognostic  $\text{pH}_T$  from FVCOM with retrieved  $\text{pH}_T$  from our ANN model and add the following sentence to the paragraph in II. 214-218 of the revised manuscript:

*We also compared monthly average  $\text{pH}_T$  provided by the Changjiang Biology FVCOM with  $\text{pH}_T$  retrieved by the ANN model using the Changjiang Biology FVCOM output at the surface and bottom on the ECS shelf (Fig. 3S), it showed that the ANN model can potentially provide a more accurate  $\text{pH}_T$ . The possible reason was that the carbonate system from the Changjiang Biology FVCOM was not optimized due to challenges obtaining sufficient boundary information.*

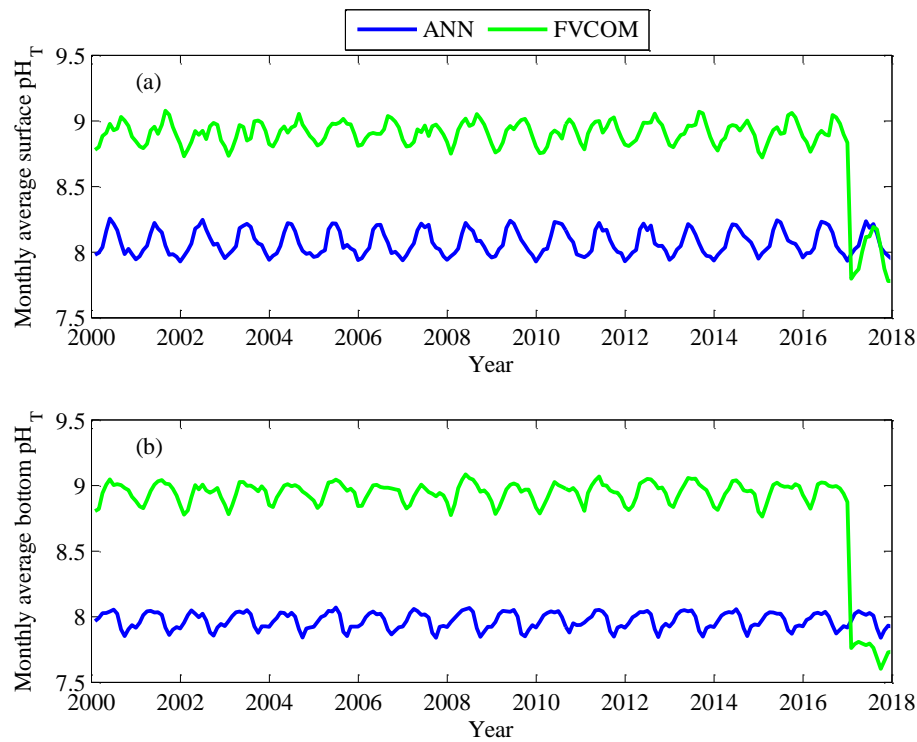

Figure S3 (revised): Comparison of monthly average  $\text{pH}_T$  on the East China Sea shelf. Blue solid line represents retrieved  $\text{pH}_T$  by the ANN model using Changjiang Biology FVCOM output; green solid line represents simulated  $\text{pH}_T$  by the Changjiang Biology FVCOM. (a)-surface; (b)-bottom.

## Referee comment by Richard Mills

### 4. Detailed comments:

Lines 34-35: The authors state, while comparing ANNs to multiple linear regression, that ANNs have the advantage of not requiring 'an a priori model but rather "learn" the model from existing data'. I think it would be more precise to say that they are nonparametric models and do not require assuming any underlying statistical distribution.

We agree with the referee. See II. 37-38 of the revised manuscript:

~~they do not require an a priori model but rather "learn" the model from existing data~~ they are non-parametric models and do not require assuming any underlying statistical distribution.

Lines 75 and 78: The authors say that samples were "poisoned" by addition of  $\text{HgCl}_2$ . I think it may be more idiomatic to say "sterilized".

We agree with the referee. See Lines 80 and 87 of the revised manuscript:

~~poisoned~~ sterilized

Line 81: "The final number of data used by the ANN model was 1854". I would say the final number of "observations" or "records", to be precise.

We agree with the referee. See Line 94 of the revised manuscript:

the final number of observations from confirmatory dataset was 1854

Line 94: The authors talk about a model being "over-matched". I believe that "overfitted" is the term they mean.

We agree with the referee. See Line 107 of the revised manuscript:

*the testing set was used to monitor whether the model was over-~~fitted~~<sup>matched</sup>*

**There are problems with low resolution for all of the figures. Figure 1 is not really even readable. Figures need to be re-generated with much higher resolution, or using vector, rather than raster, formats.**

We agree with the referee. Figures will be re-generated with higher resolution or using vector. As follows:

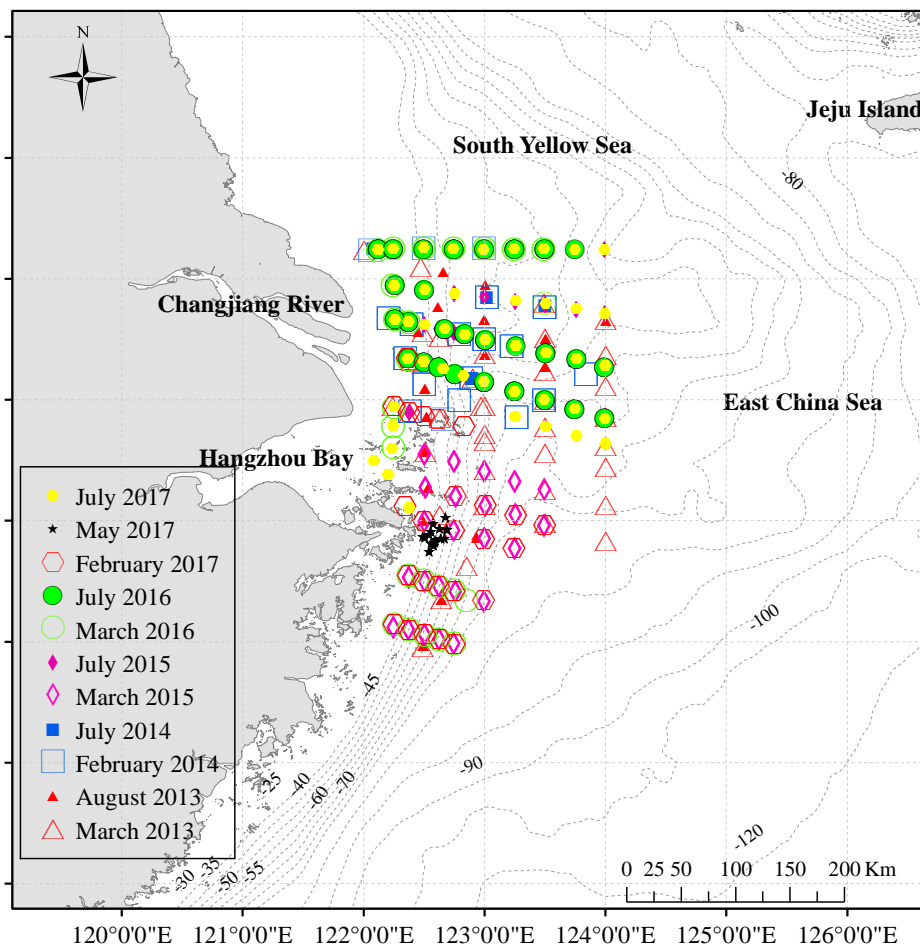

**Figure 1 (revised): Sampling stations during 11 cruises (as confirmatory dataset) from 2013 to 2017 on the East China Sea shelf.**

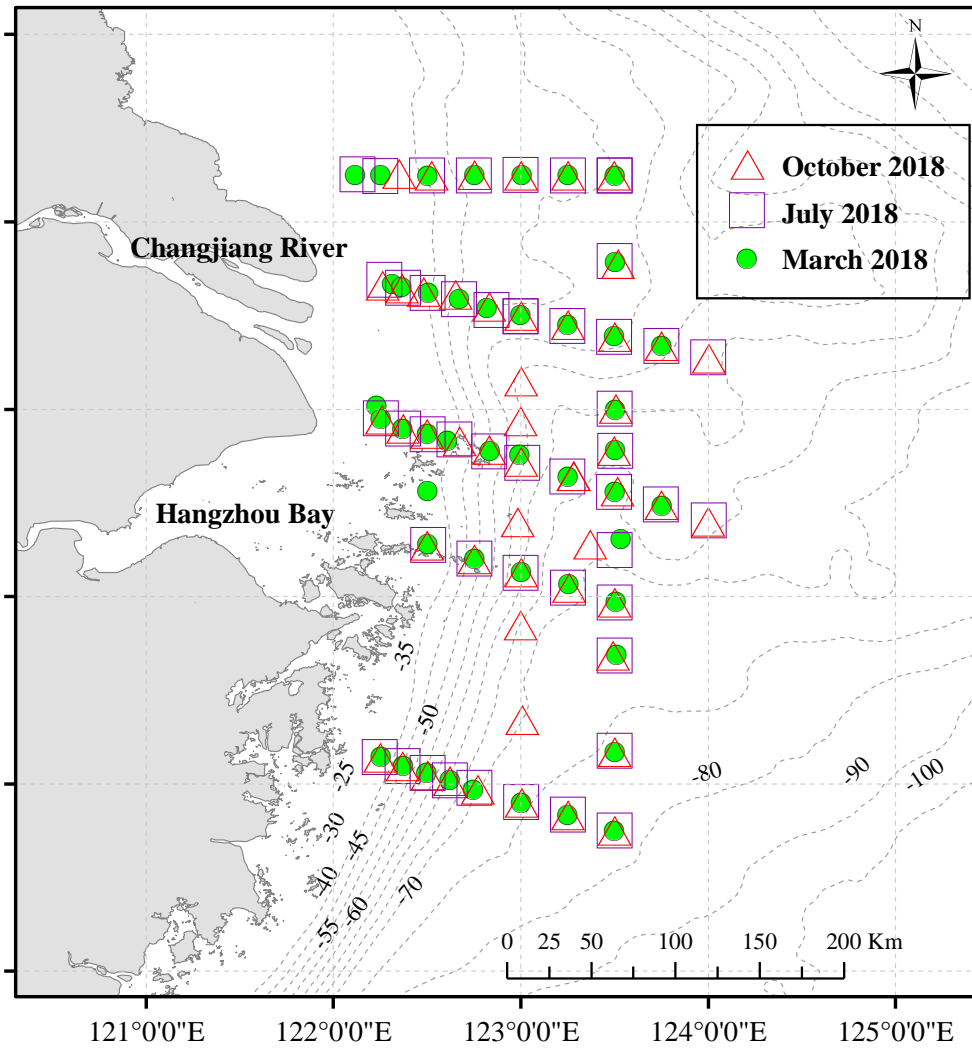

**Figure 2 (revised):** Sampling stations for three cruises (as exploratory dataset) used to extend the utility of the ANN model. The green circles represent March 2018, the purple squares represent July 2018, the red triangles represent October 2018.

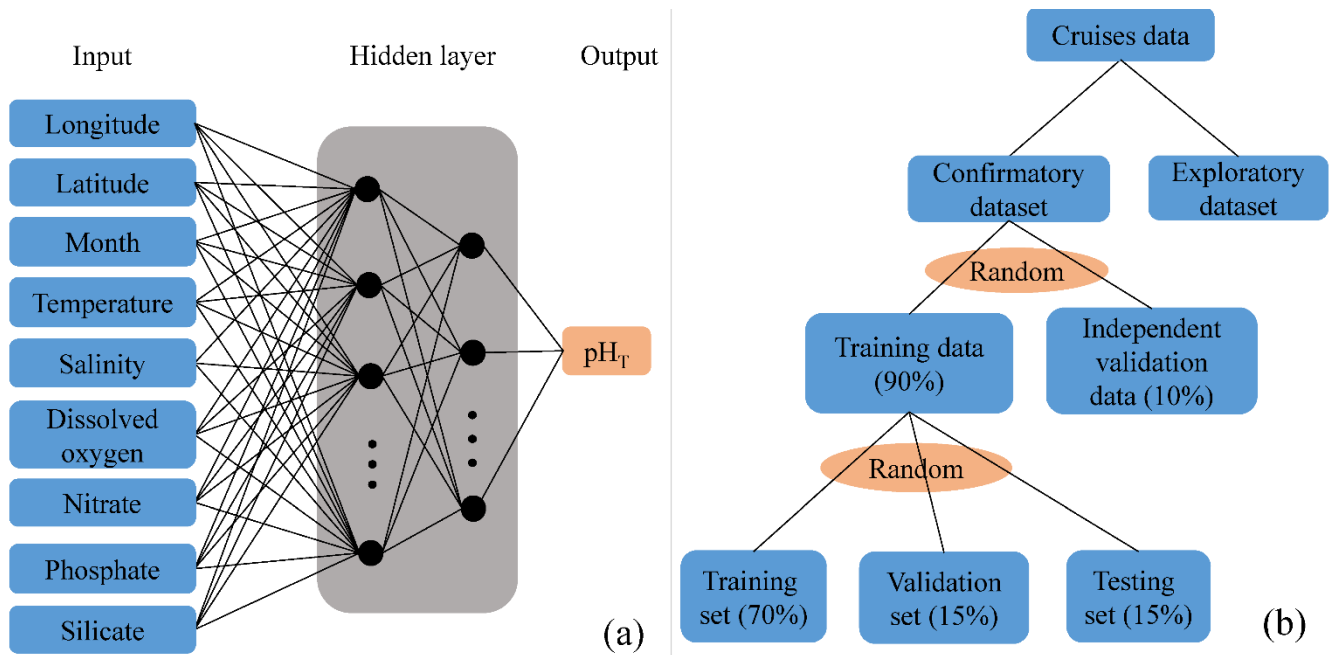

**Figure 3 (revised):** Schematic representation of the neural network algorithm to retrieve pH<sub>T</sub>. (a)-the architecture of the ANN model. Input variables are observed temperature, salinity, dissolved oxygen, nitrate, phosphate, and silicate together with the geolocation (longitude and latitude) and time (month) of sampling; (b)-data distribution diagram for training and prediction.



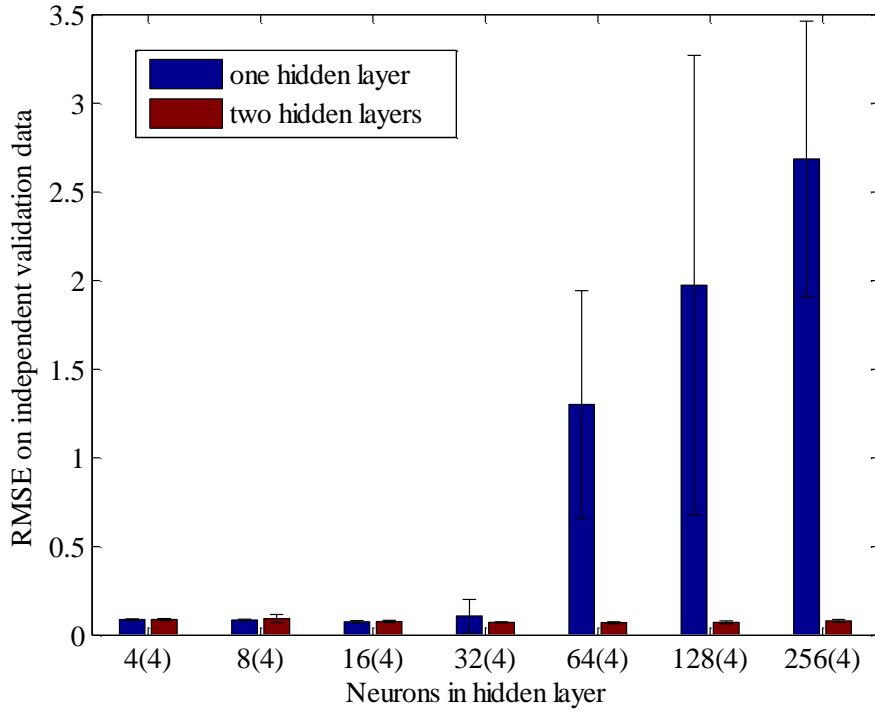

**Figure 4 (revised):** Comparison of the performance of one hidden layer and two hidden layers on independent validation data. The result displayed are the mean and standard deviation of ten-fold cross-validation for each number of neurons in the hidden layer. The number in parentheses presents the number of neurons in the second hidden layer for two hidden layers.

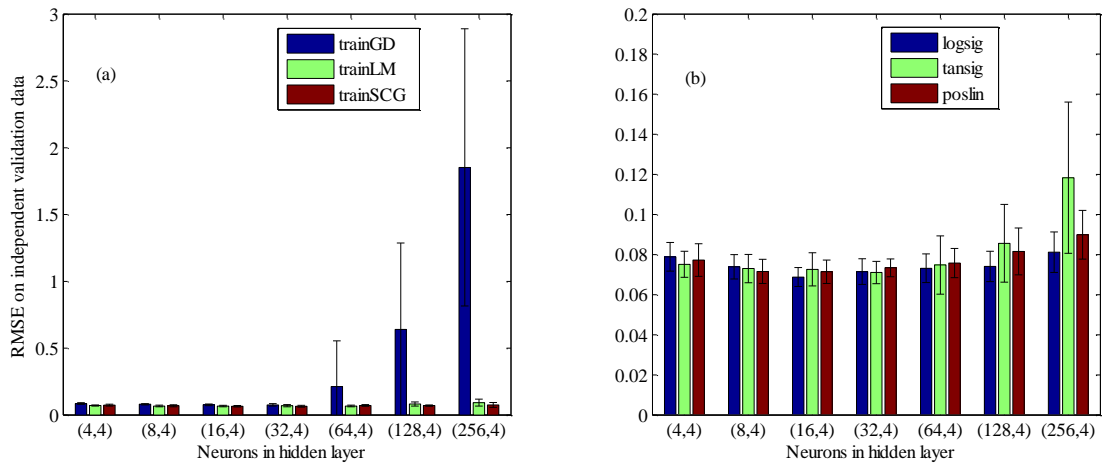

**Figure 5 (revised):** Comparison of the performance of different training functions and transfer functions on independent validation data. (a)-three training functions: Gradient descent backpropagation (trainGD), Levenberg-Marquardt backpropagation (trainLM), Scaled conjugate gradient backpropagation (trainSCG); (b) three transfer functions: Log-sigmoid transfer function (logsig), Hyperbolic tangent sigmoid transfer function (tansig); Positive linear transfer function (poslin). The result displayed are the mean and standard deviation of ten-fold cross-validation for each number of neurons in the hidden layer.

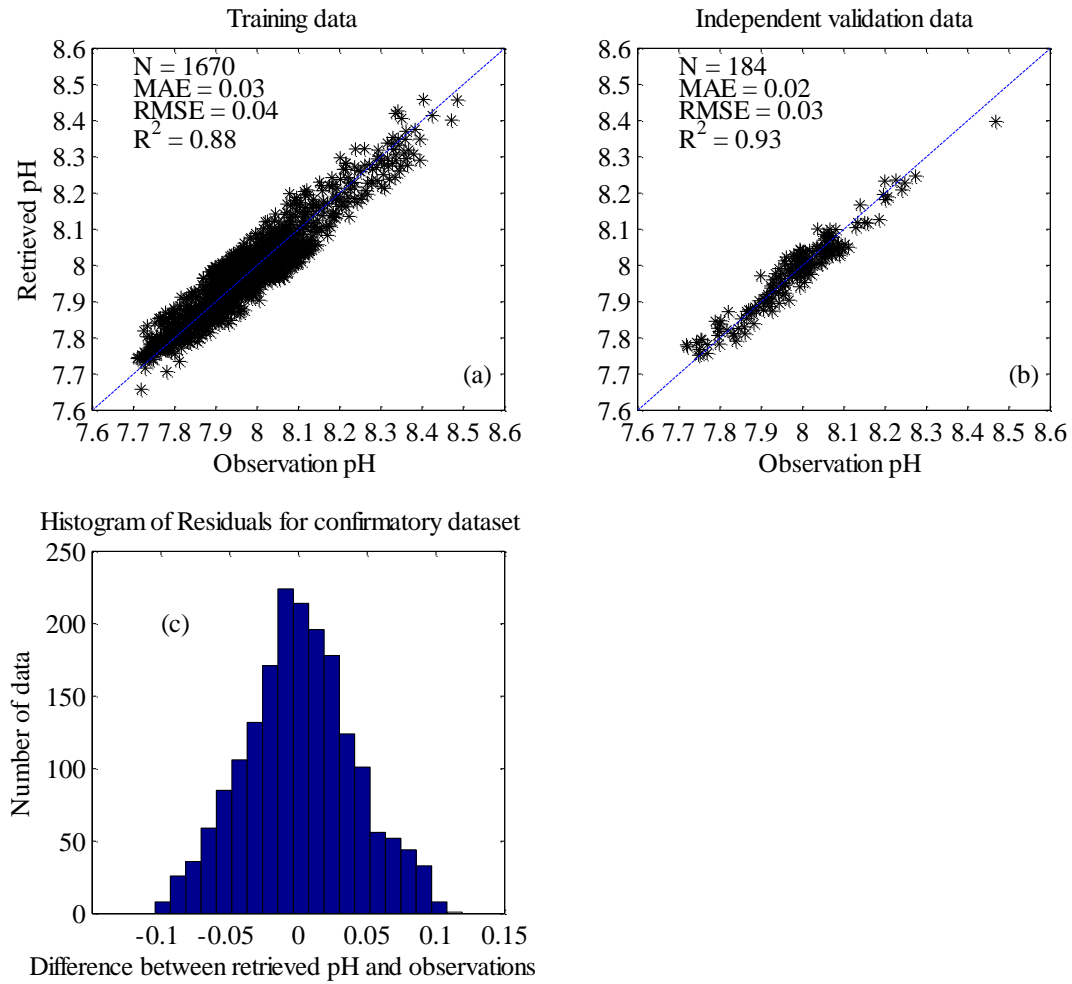

**Figure 6 (revised):** Comparison of  $pH_T$  retrieved by the ANN model with corresponding observations. (a)-Training data (90% of confirmatory dataset); (b)-Independent validation data (10% of confirmatory dataset); (c)-Histogram of residuals for confirmatory dataset. The 1:1 line is shown in each plot as visual reference. Three statistics are the mean absolute error (MAE), the coefficient of determination ( $R^2$ ), and the root mean squared error (RMSE). N represents the number of data points.

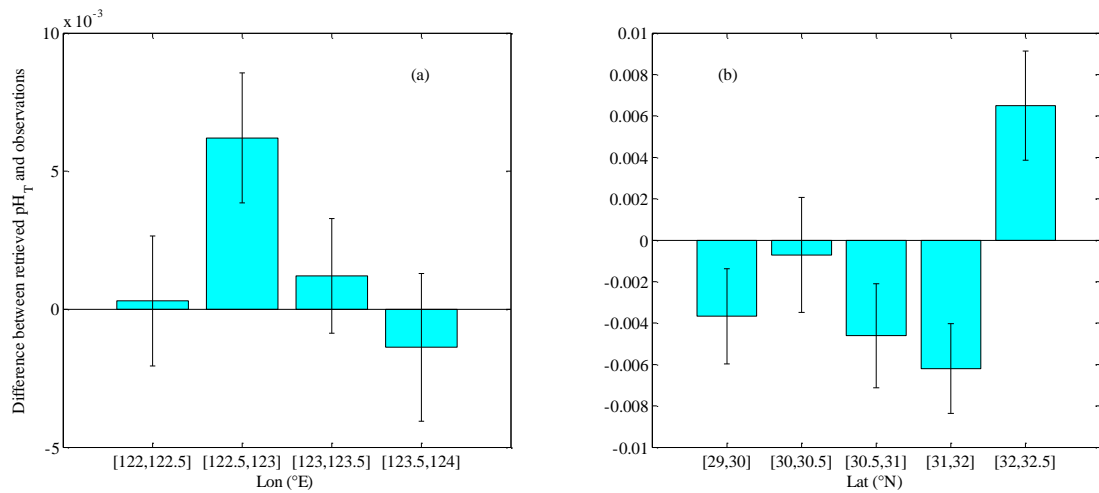

**Figure 7 (revised):** Box plots of the differences between retrieved  $pH_T$  minus the observations. (a)-the differences vs longitude (Mean $\pm$ SE); (b)-the differences vs latitude (Mean $\pm$ SE). The height of each box represents the mean value of the differences, the whisker represents the standard error (SE) value of the differences.

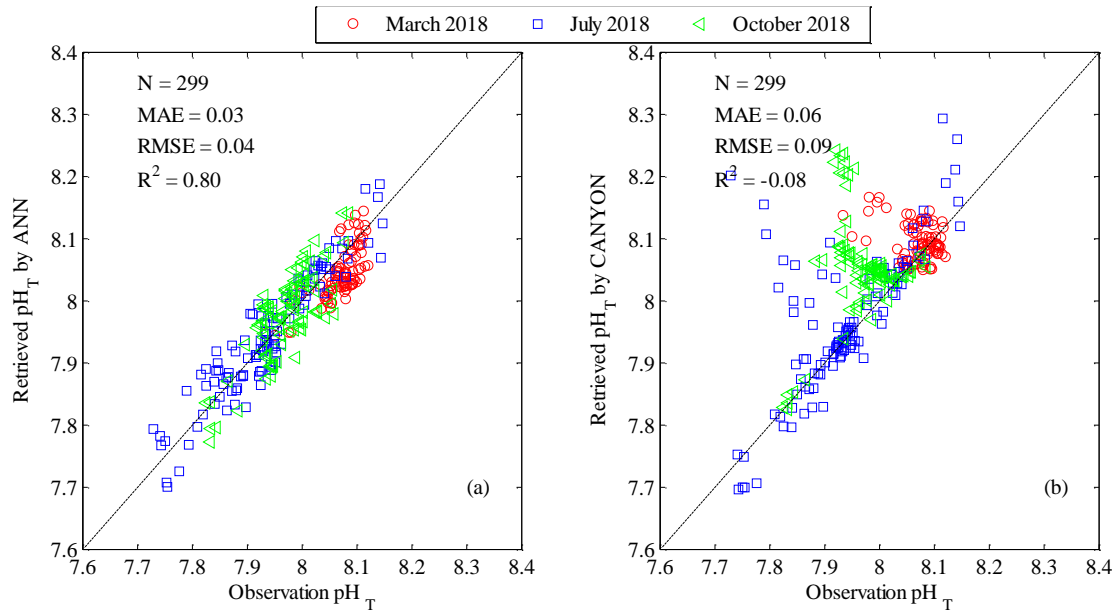

**Figure 8 (revised):** Comparison of retrieved  $\text{pH}_T$  with corresponding observations for exploratory dataset. (a)- $\text{pH}_T$  retrieved by the ANN model vs observations; (b)- $\text{pH}_T$  retrieved by CANYON (Sauzède et al., 2017) vs observations. The red circles represent March 2018, the blue squares represent July 2018, the green triangles represent October 2018. The 1:1 line is shown in the plot as visual reference. Three statistics approaches used are the mean absolute error (MAE), the coefficient of determination ( $R^2$ ), and the root mean squared error (RMSE). N represents the number of data points.

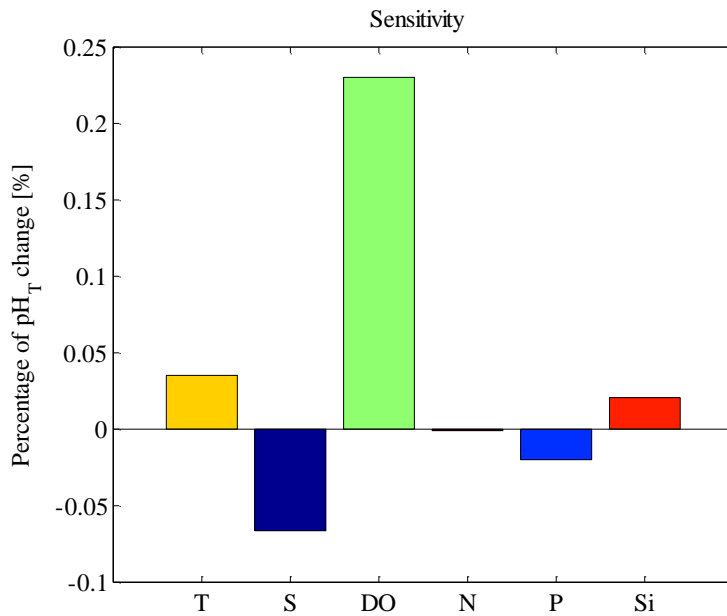

**Figure 9 (revised):** Sensitivity of the ANN model for environmental input variables: temperature (T), salinity (S), dissolved oxygen (DO), nitrate (N), phosphate (P) and silicate (Si).

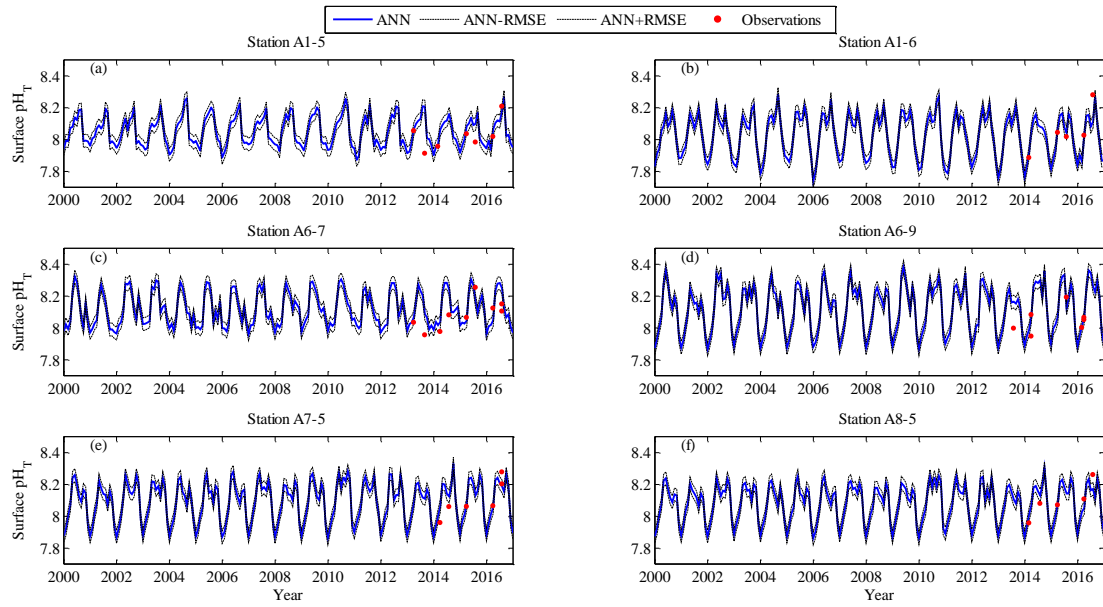

**Figure 10 (revised):** Comparison of surface  $pH_T$  retrieved by the ANN model using Changjiang Biology FVCOM output with corresponding observations at six sites repeated sampling for 3 to 4 years. Red dots represent observations  $pH_T$ , blue solid line represents retrieved  $pH_T$ , black dotted line represent retrieved  $pH_T \pm RMSE$ . (a)-station A1-5; (b)-station A1-6; (c)-station A6-7; (d)-station A6-9; (e)-station A7-5; (f)-station A8-5.

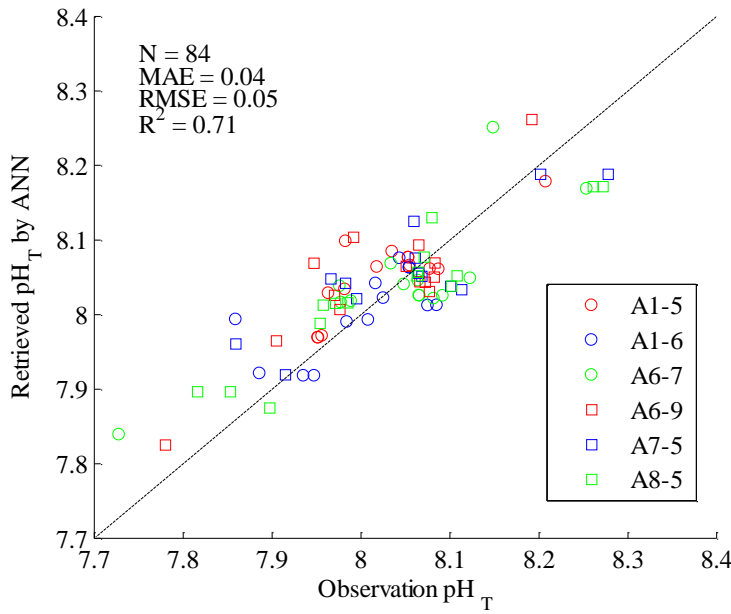

**Figure 11 (revised):** Comparison of water column  $pH_T$  retrieved by the ANN model using Changjiang Biology FVCOM output with corresponding observations at six sites repeated sampling for 3 to 4 years. The 1:1 line is shown in the plot as a visual reference. Skill statistics include the mean absolute error (MAE), the coefficient of determination ( $R^2$ ), and the root mean squared error (RMSE). N represents the number of data points.

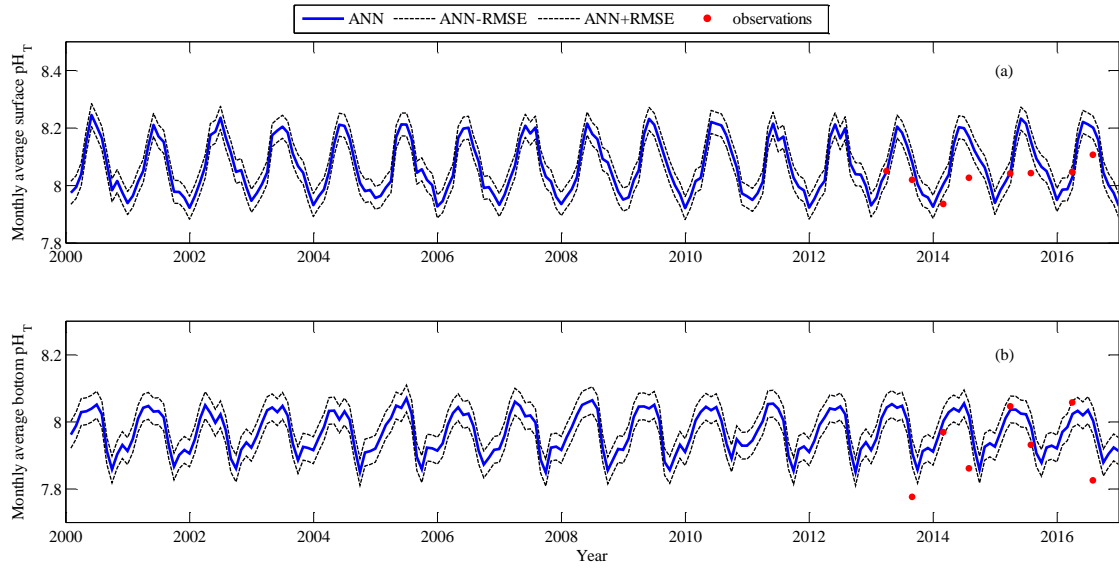

**Figure 12 (revised):** Comparison of monthly average  $pH_T$  on the East China Sea shelf. Blue solid line represents retrieved  $pH_T$  by the ANN model using Changjiang Biology FVCOM output; black dotted line represents retrieved  $pH_T \pm RMSE$ ; red points show monthly-average  $pH_T$  observations from 2013 to 2016. (a)-surface; (b)-bottom.

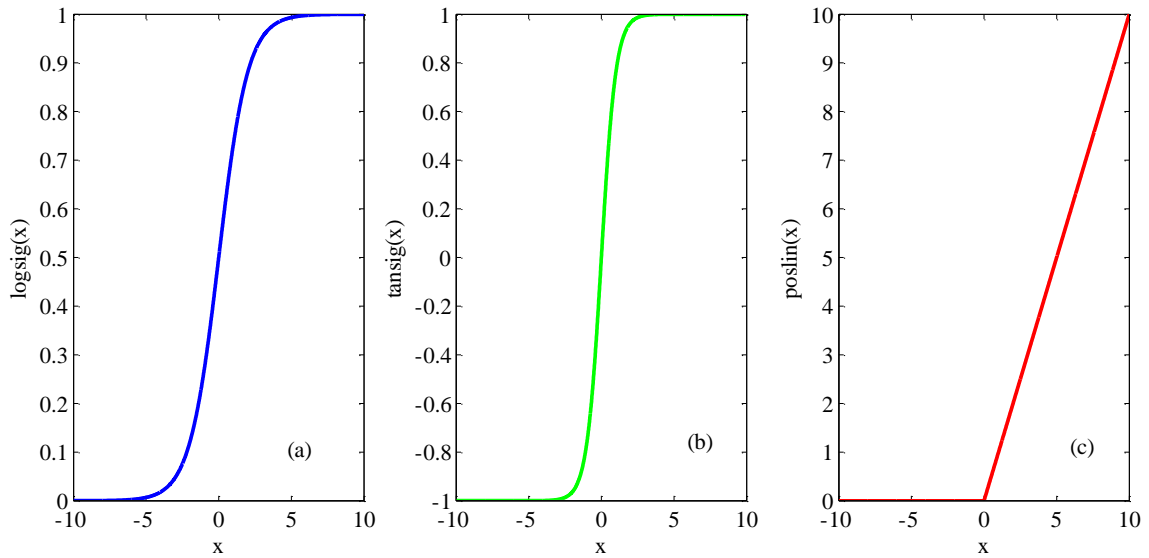

**Figure S1 (revised):** Comparison of three transfer functions. (a)-Log-sigmoid transfer function (logsig); (b) Hyperbolic tangent sigmoid transfer function (tansig); (c)-Positive linear transfer function (poslin).

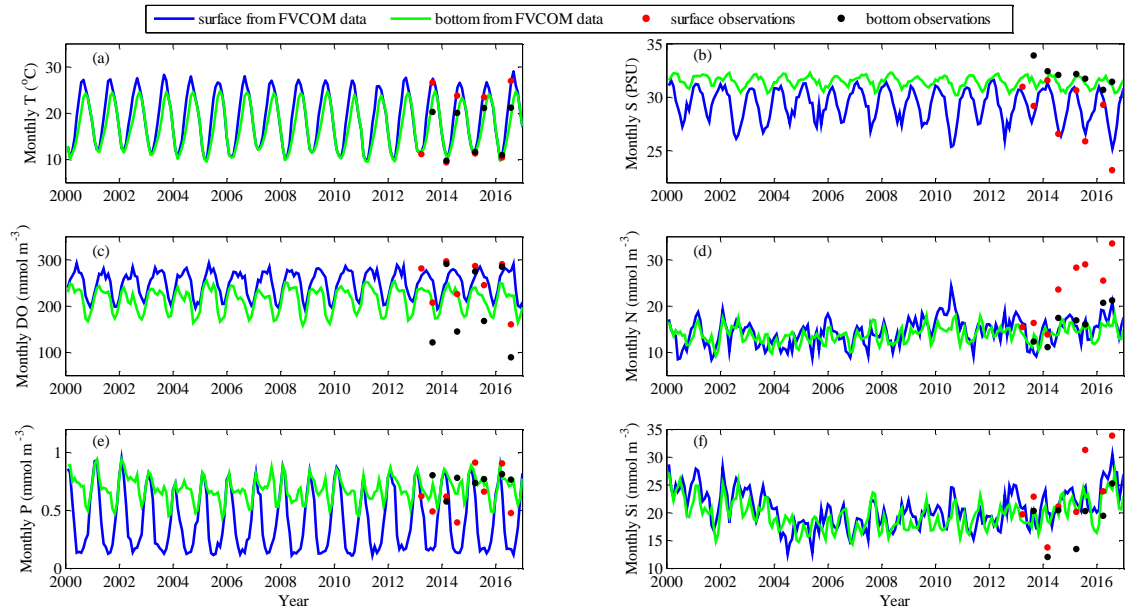

**Figure S2 (revised):** Comparison of monthly-average environmental variables from the Changjiang Biology FVCOM with the corresponding observations at the surface and bottom on the East China Sea shelf. Blue and green solid lines represent surface and bottom simulated data from the Changjiang Biology FVCOM, respectively; red and black points show surface and bottom observation data from 2013 to 2016, respectively. (a)-temperature; (b)-salinity; (c)-dissolved oxygen; (d)-nitrate; (e)-phosphate; (f)-silicate.

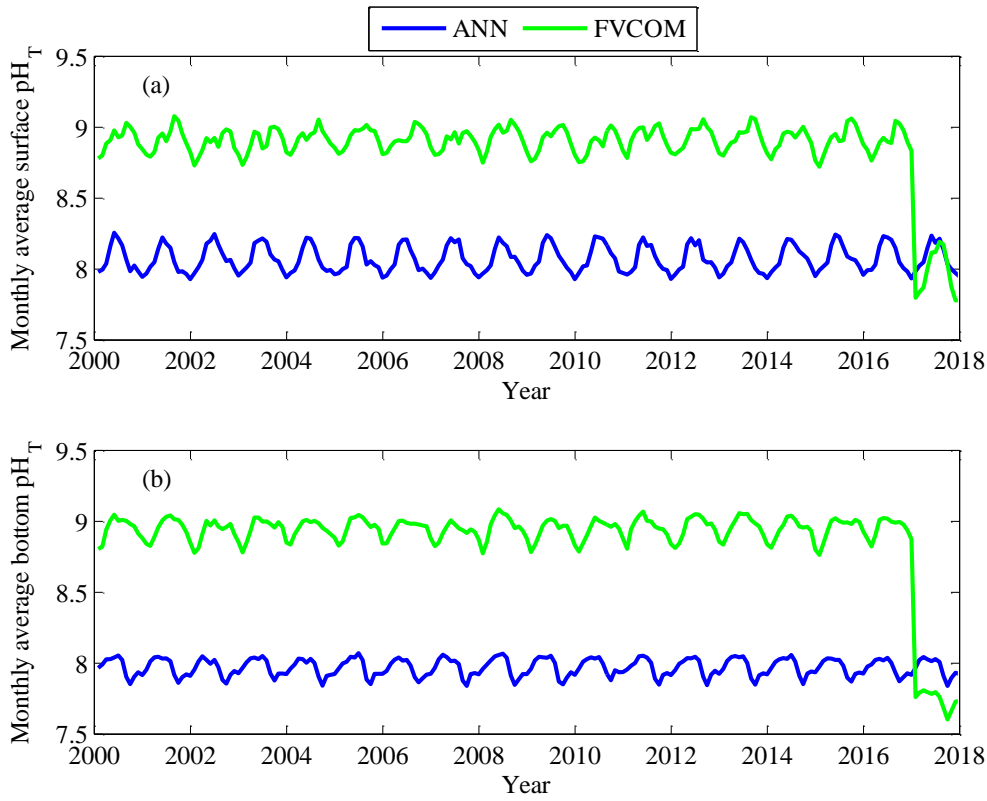

**Figure S3 (revised):** Comparison of monthly average  $pH_T$  on the East China Sea shelf. Blue solid line represents retrieved  $pH_T$  by the ANN model using Changjiang Biology FVCOM output; green solid line represents simulated  $pH_T$  by the Changjiang Biology FVCOM. (a)-surface; (b)-bottom.

# Retrieving monthly and interannual $\text{pH}_T$ on the East China Sea shelf using an artificial neural network: ANN- $\text{pH}_T$ -v1

Xiaoshuang Li<sup>1,2</sup>, Richard Bellerby<sup>1,2</sup>, Jianzhong Ge<sup>1</sup>, Philip Wallhead<sup>2</sup>, Jing Liu<sup>1</sup>, and Anqiang Yang<sup>1</sup>

<sup>1</sup>State Key Laboratory of Estuarine and Coastal Research, East China Normal University, Shanghai, 200241, China

<sup>2</sup>Norwegian Institute for Water Research, Bergen, 5006, Norway

Correspondence to: Richard Bellerby (Richard.Bellerby@niva.no)

**Abstract.** While our understanding of pH dynamics has strongly progressed for open ocean regions, for marginal seas such as the East China Sea (ECS) [shelf](#) progress has been constrained by limited observations and complex interactions between biological, physical, and chemical processes. Seawater pH is a very valuable oceanographic variable but not always measured using high quality instrumentation and according to standard practices. In order to predict water column total scale pH ( $\text{pH}_T$ ) and enhance our understanding of the seasonal variability of  $\text{pH}_T$  on the ECS shelf, an artificial neural network (ANN) model was developed using 11 cruise datasets from 2013 to 2017 with coincident observations of  $\text{pH}_T$ , temperature (T), salinity (S), dissolved oxygen (DO), nitrate (N), phosphate (P) and silicate (Si) together with sampling position and time. The reliability of the ANN model was evaluated using independent observations from 3 cruises in 2018, and showed a root mean square error accuracy of 0.04. ~~A weight analysis of the ANN model variables suggested that DO, S, T were the most important predictor variables.~~ The ANN model responded to T, DO, and Si in a positive way, S and P in a negative way, and the variable with the greatest sensitivity was DO, followed by S and T. Monthly water column  $\text{pH}_T$  for the period 2000-2016 was retrieved using T, S, DO, N, P, and Si from the Changjiang Biology Finite-Volume Coastal Ocean Model (FVCOM). [The agreement is good here in winter, the reduced performance in summer can be attributed in large part a reduced performance of the Changjiang Biology FVCOM in simulating summertime input variables.](#)

## 1 Introduction

Atmospheric carbon dioxide ( $\text{CO}_2$ ) levels have increased by nearly 46%, from approximately 278 ppm (parts per million) in 1750 (Ciais et al., 2013) to 405 ppm in 2017 (Le Quéré et al., 2018). The oceans have absorbed approximately 48% of the anthropogenic  $\text{CO}_2$  emissions (Sabine et al., 2004), resulting in decreasing long-term pH trends of  $\sim 0.02 \text{ decade}^{-1}$  in open ocean waters (e.g., Dore et al., 2009; González-Dávila et al., 2010; Bates et al., 2014; Lauvset et al., 2015). While a gradual decrease in pH is a predictable open ocean response to elevated anthropogenic  $\text{CO}_2$  emissions, the seasonal changes and long-term trends in pH in coastal seas have not been fully understood due to the lack of long-term pH data and complexity of coastal systems. In this context, the development of approaches to predict carbonate chemistry parameters in coastal regions may assist both the management of local water quality and our wider understanding of the ocean carbon cycle.

Many attempts have been made to predict seawater pH by developing empirical relationships between pH and environmental variables, such as temperature (T) (Juranek et al., 2011), salinity (S) (Williams et al., 2016), dissolved oxygen (DO) (e.g., Juranek et al., 2011; Sauzède et al., 2017), nutrients (e.g., Williams et al., 2016; Carter et al., 2016, 2018), and longitude, latitude (Sauzède et al., 2017). Compared with traditional empirical methods, artificial neural networks (ANNs) ~~have shown improved performance (Chen et al., 2017).~~ ANNs have been proposed as powerful tools for modelling uncertain and complex systems such as ecosystems and environmental assessment (e.g., Olden and Jackson, 2002; Olden et al., 2004; Uusitalo, 2007; Raitos et al., 2008; [Chen et al., 2017](#)). Their main advantage compared with multiple linear regression (MLR) models is that ~~they do not require an a-priori model but rather “learn” the model from existing data~~ [they are non-parametric models and do not require assuming any underlying statistical distribution](#). ANNs have been used for the retrieval of the partial pressure of carbon dioxide ( $\text{pCO}_2$ ) (e.g., Friedrich and Oschlies, 2009; Laruelle et al., 2017), total alkalinity (e.g., Velo et al., 2013; Bostock et al., 2013; Sasse et al., 2013), total dissolved inorganic carbon (e.g., Bostock et al., 2013; Sasse et al., 2013), and

phytoplankton functional types (e.g., Raitsos et al., 2008; Palacz et al., 2013). However, these studies mainly focus on the open ocean; relatively few studies have focused on coastal seas, perhaps because of the complexity and heterogeneity of the continental shelves. Alin et al. (2012) developed an MLR model to reconstruct pH in the southern California Current System, while Moore-Maley et al. (2016) evaluated the interannual variability of near-surface pH using a one dimensional, biophysical, mixing layer model in the Strait of Georgia. To our knowledge, no empirical relationship for pH has yet been established for the ECS.

The ECS is the largest marginal sea in the western North Pacific Ocean and receives massive terrestrial inputs from the Changjiang (Yangtze River) River (Gong et al., 1996). The shelf shallower than 200 m covers more than 70% of the entire ECS (e.g., Ichikawa and Beardsley, 2002; Lie and Cho, 2016), where the dominant currents present seasonal circulation patterns. The spatial and temporal distributions of the carbonate system have been investigated in the ECS (e.g., Chou et al., 2009; Cao et al., 2011; Qu et al., 2015), and were found to largely reflect the distributions of various water masses. The pattern of carbon sources and sinks exhibits substantial seasonal variation (Guo et al., 2015), and the ECS is generally considered as a sink of atmospheric CO<sub>2</sub> throughout the year except in fall (e.g., Shim et al., 2007; Zhai and Dai, 2009). A mechanistic semi-analytical algorithm (MeSAA) was developed to study pCO<sub>2</sub> variations in response to various controlling mechanisms during summertime (Bai et al., 2015). However, the seasonal variability of pH has been very little studied in the ECS, mainly due to the limited observational coverage and irregular variability caused by seasonal fluctuations of the Changjiang River discharge and anthropogenic processes. Developing methods to extend the seasonal coverage of pH data may thus help to improve our understanding of the ocean carbon cycle in the ECS.

This paper is structured as follows: section 2 describes the cruise data used to build the ANN model building; section 3 shows the performance, sensitivity and application of the ANN model performance and predictor variable importance, as well as an application to retrieve monthly pH for the period 2000–2016 on the ECS shelf using the monthly temperature, salinity, dissolved oxygen, nitrate, phosphate and silicate from the Changjiang Biology Finite Volume Coastal Ocean Model (FVCOM). Summary and conclusions and perspectives are summarized in the last section.

## 2 Data and method

### 2.1 Data

Ten Eleven cruises were conducted on the ECS shelf from 2013 to 2017 (Fig. 1). Ten of these were carried out during the “Fund Committee Innovation Group Project” (Y22323101B) from 2013 to 2017 (Fig. 1), the summer cruise from 17 to 28 August 2013, 10 to 17 July 2014, 9 to 20 July 2015, 4 to 28 July 2016, 20 to 30 July 2017, the winter cruise from 21 to 28 February 2014, 15 to 28 February 2017, the spring cruise from 4 to 20 March 2013, 11 to 21 March 2015, 7 to 19 March 2016; the remaining cruise was carried out on the ECS shelf during 12–24 May 2017. Water samples were collected at three or four different depths during all cruises. T and S profiles were obtained directly using a conductivity temperature-depth/pressure (CTD) recorders (SBE 25plus or 911plus). Measurement of DO followed the Winkler procedure, as described previously by Zhai et al. (2014). Nutrients samples were first filtered with 0.45 µm Whatman GF/F membrane, then stored in 250 mL HDPE bottles until chemical analysis. Nitrate (N), phosphate (P) and silicate (Si) were determined using a segmented flow analyzer (Model: Skalar SAN<sup>PLUS</sup>, Netherlands) with a precision < 3% (Zhang et al., 2007), the detection limits are 0.14 µM for N, 0.06 µM for P, and 0.07 µM for Si. During the May 2017 survey, pH samples were stored in 500 mL high-quality borosilicate glass bottles without filtering and poisoned by addition of 200 µL saturated HgCl<sub>2</sub> solution until measured in the lab. The pH<sub>T</sub> (total scale) was measured using an Automated Flow-through system for Embedded Spectrophotometry (AFtes) with a precision of 0.0005 pH<sub>T</sub> unit and uncertainty of < 0.003 (Reggiani et al., 2016). During all other cruises, pH samples were stored in 140 mL brown borosilicate glass bottles and poisoned sterilized by addition of 50 µL saturated HgCl<sub>2</sub> solution. Three traceable pH buffers were used including NIST (National Institute of Standards and Technology) buffers pH = 4.00, 7.02, 10.09. As



described by Zhai et al. (2012, 2014), we converted it into total scale [by subtracting 0.143](#) and the overall accuracy of the pH<sub>T</sub> data was estimated as 0.01.

85 [Three cruises were carried out on the ECS shelf in 2018 \(Fig. 2\) during the “National Natural Science Foundation Shared Voyage Plan”, from 10 to 19 March, 12 to 20 July, 12 to 21 October, and one cruise was carried out near the Changjiang Estuary during May 2017 \(Fig. 1\). The measurement methods of T, S, DO, and nutrients are the same as that of the above ten voyages. pH samples were stored in 500 mL high-quality borosilicate glass bottles without filtering and sterilized by addition of 200  \$\mu\$ L saturated HgCl<sub>2</sub> solution until measured in the lab. The pH<sub>T</sub> was measured at the temperature in the flow cell using an Automated Flow-through system for Embedded Spectrophotometry \(AFtes\) with a precision of 0.0005 pH unit and](#)  
90 [uncertainty of < 0.003 \(Reggiani et al., 2016\). Water samples were collected at three or four different depths during all cruises. We omitted data points where one or more other physical variables were missing. ~~The final number of data used by the ANN model was 1854, and the distribution of the sampling sites from the 11 cruises is shown in Fig. 1.~~ The three cruises during 2018 \(Fig. 2\) were used to estimate model predicted performance as exploratory dataset, while the remaining eleven cruises \(Fig. 1\) were used to train model as confirmatory dataset, the final number of observations from confirmatory dataset was](#)  
95 [1854, m](#)More detailed information on the field survey can be found in Table 1.

## 2.2 Artificial neural network development

The ANN we used is a feed-forward multilayer perceptron (Tamura and Tateishi, 1997) with two hidden layers. The neurons of each layer are connected with the neurons of the previous layer and the next layer by weights (Fig. [23a](#)). The coefficients of the weight matrix are iteratively tuned in the training step. ~~Here we used the back-propagation conjugate gradient technique (Hornik et al., 1989).~~ In order to avoid overfitting, a ten-fold cross-validation was used to assess model prediction accuracy  
100 [\(Fig. 3b\). Here, ~~the cruise data were~~ confirmatory dataset was randomly divided into ten equal subsamples. One subsample was used as the independent validation data \(10% of ~~all cruise data~~ confirmatory dataset\), which was always excluded from training, and the nine remaining subsamples were together used as training data \(90% of ~~all cruise data~~ confirmatory dataset\). The training data were further divided randomly into a training set \(70% of training data\), validation set \(15% of training data\),](#)  
105 [and testing set \(15% of training data\) during the training process. The training set was used for computing the gradient and updating the network weights and biases. ~~T~~ the validation set was used to monitor the error and control model stop during the training process. ~~T~~ the testing set was used to monitor whether the model was over-fitted](#)  
[matched \(Palacz et al., 2013\). We compared performances in predicting the independent validation data from the ten-fold cross-validation and selected the optimal model based on the lowest root mean square error \(RMSE\). Then we applied the optimal model to the exploratory](#)  
110 [dataset \(Fig. 2\) to evaluate model predicted performance by calculating error statistics.](#) In our study, calculations were done in the MathWorks Matlab environment, using the Deep Learning Toolbox.

[Firstly, we compared the performance of one hidden layer and two hidden layers on independent validation data, the number of neurons varied from 2<sup>2</sup> to 2<sup>8</sup> for one hidden layer and fixed at four in the second hidden layer for two hidden layers \(Fig. 4\), the result of ten-fold cross-validation showed that the model with two hidden layers performed better as the number of neurons](#)  
115 [increased. Secondly, in order to choose suitable training techniques and activation functions of the ANN model with two hidden layers, three training functions \(Gradient descent backpropagation \(trainGD\), Levenberg-Marquardt backpropagation \(trainLM\), Scaled conjugate gradient backpropagation \(trainSCG\)\), which differ on how the weights are modified, and three transfer functions \(Log-sigmoid transfer function \(logsig\), Hyperbolic tangent sigmoid transfer function \(tansig\); Positive linear transfer function \(poslin\)\) were tested \(Fig. 5\). The output values of logsig, tansig and poslin are squashed into \[0, 1\], \[-1, 1\], and \[0, + \$\infty\$ \], respectively \(Fig. S1\). The result demonstrated that as the number of neurons increased, the performances of trainGD and tansig became poor. Although there was no obvious difference between trainLM and trainSCG, here training technique trainSCG was selected and transfer function logsig was applied to two hidden layers considering the overall performance \(Fig. 5\). Thirdly, in the training phase of the ANN model, the number of neurons was tested, varying from 4 to](#)  
120

128 for two hidden layers (Table S1). It was found that the number of neurons was set to 40 in the first hidden layer and 16 in the second layer, the ANN model showed the best performance for both training data and independent validation data. Finally, different combinations of input variables were tested to choose the optimal architecture of the ANN model (Table 2). The result showed that the performance of the ANN model was optimal when As shown in Fig. 2, input variables include longitude, latitude, month, T, S, DO, N, P and Si were used as input variables. We selected these variables as principal inputs for the following reasons: the carbonate system thermodynamic relationships depend on T and S (Lueker et al., 2000); DO was expected to vary with pH and there was a tight positive link between DO and pH (Wootton et al., 2012) because of the role of photosynthesis and respiration in removing or generating CO<sub>2</sub> in the water; nutrients influence phytoplankton growth and abundance, which might increase organic carbon fixation, increasing inorganic carbon uptake and increasing pH (Wootton et al., 2008, 2012). We found geographical information to be a powerful addition in improving the skill of the method (see Table 2), allowing the network to learn spatio-temporal patterns that could not be explained by other input variables (Sasse et al., 2013). The number of neurons in the two hidden layers was tested, varying between 1 and 100 for the first hidden layer and between 1 and 50 for the second hidden layer. The optimal architecture was composed of two hidden layers with 40 neurons in the first and 16 neurons in the second.

In order to avoid bias towards high-value inputs/outputs and to eliminate the dimensional influence of the data, all data used by the ANN model were normalized using the following equation (e.g., Sauzède et al., 2015, 2016):

$$140 \quad x_{i,j} = \frac{2}{3} * \frac{x_{i,j} - \text{mean}(x_{i,j})}{\sigma(x_{i,j})} \quad (1)$$

with  $\sigma$  the standard deviation of the considered input variables or output variable pH<sub>T</sub>. Similar to the approach of Sauzède et al. (2015, 2016), the longitude and month input variables were transformed as follows to account for the periodicity:

$$\text{slongitude} = \sin\left(\frac{\text{Lon} * \pi}{180}\right), \text{clongitude} = \cos\left(\frac{\text{Lon} * \pi}{180}\right) \quad (2)$$

$$\text{smmonth} = \sin\left(\frac{\text{month} * \pi}{6}\right), \text{cmmonth} = \cos\left(\frac{\text{month} * \pi}{6}\right) \quad (3)$$

145 The latitude variable was transformed into the range of the sigmoid function by dividing by 90 (Sauzède et al., 2015), then normalized using (1).

### 3 Result and discussion

#### 3.1 The ANN model performance

To evaluate the performance of the ANN model, we compared model simulated pH<sub>T</sub> (pH<sub>T</sub><sup>M</sup>) with corresponding observations (pH<sub>T</sub><sup>O</sup>) using several statistical indices, including the mean absolute error (MAE), the coefficient of determination (R<sup>2</sup>), and the root mean squared error (RMSE). The model simulated pH<sub>T</sub> with a RMSE = of 0.04 and R<sup>2</sup> = of 0.88 for the training data (90% of all data, Fig. 3a confirmatory dataset, Fig. 6a), and predicted pH<sub>T</sub> with a RMSE = of 0.03 and R<sup>2</sup> = of 0.93 for the independent validation data (10% of all data, Fig. 3b confirmatory dataset, Fig. 6b). The distributions of the differences (pH<sub>T</sub><sup>M</sup> - pH<sub>T</sub><sup>O</sup>) were approximately normal with no obvious outliers (Fig. 4). The histogram of residuals in confirmatory dataset (Fig. 6c) showed that 68% of the residuals were within the RMSE of 0.04.

In order to further explore where the ANN model may lead to large errors, we plotted distributions of differences (pH<sub>T</sub><sup>M</sup> - pH<sub>T</sub><sup>O</sup>) with respect to the longitude and latitude (Fig. 57). The points with large errors are mainly concentrated in the longitude range [122.5°E, 123°E] and the latitude range [32.1°N, 32.5°N], in an area strongly influenced by the Changjiang Dilute Water (CDW). The reduced performance of the ANN model here can be primarily attributed to seasonal oscillations of the Changjiang River discharge (Dai and Trenberth, 2002). As a reference, the performance of some empirical approaches, including MLR, multi-variate nonlinear regression (MNR), decision tree, random forest, and Support Vector Machine (SVM) regression, was shown in Table 3. Clearly, the ANN model showed better performance than other tested approaches using same input variables (Table 2, Model#10). Although the RMSE for pH<sub>T</sub> we obtained here was higher than obtained in some previous studies (e.g.,

Juranek et al., 2011; Williams et al., 2016; Sauzède et al., 2017), their research regions were open ocean regions, not coastal seas. For example, Juraneck et al. (2011) developed empirical algorithms to estimate pH with RMSE of 0.018 for data between 30-500 m in the NE subarctic Pacific; Williams et al. (2016) also developed empirical algorithms to predict pH with RMSE of 0.01 in the Southern Ocean; Sauzède et al. (2017) developed a neural network method to estimate pH with RMSE of 0.02 in the global ocean. However, coastal seas tend to show greater temporal and spatial variability than open oceans. Alin et al. (2012) developed a MLR approach to reconstruct pH with RMSE of 0.024 in the southern California Current System. Zhai et al. (2014) compared the field measured pH with calculated pH from measured total alkalinity and dissolved inorganic carbon using the program CO2SYS.xls (Pelletier et al., 2011) and obtained discrepancies with standard deviation 0.05. Carbon chemistry parameters in this region are not only under the direct impact of Taiwan Warm Current and remote control of the Kuroshio water intrusion into the shelf but also significantly controlled by seasonal variations of the Changjiang River discharge (e.g., Isobe and Matsuno, 2008; Chen et al., 2008; Chou et al., 2009). Taking into account the highly complex hydrographic, biological and chemical conditions, the accuracy of  $pH_T$  presented is promising.

### 3.2 ~~Comparison with new field data~~ ANN model validation using exploratory dataset

To further assess the ability of the ANN model to estimate  $pH_T$  on the ECS shelf, we applied the ANN model to [exploratory dataset](#) (Fig. 2) ~~data from three cruises~~ not used in the ANN model development (Fig. 6): March, July, and October 2018. Scatterplots of retrieved  $pH_T$  vs observations (Fig. 78a) showed ~~that the ANN model predicts  $pH_T$  with~~ a RMSE of 0.04, ~~MAE of 0.03~~ and  $R^2$  of 0.80 ~~for these cruise data. This result is~~ It was consistent with the ~~result performance~~ of the training data (Fig. 36a), ~~which further reflects the stability and reliability of the ANN model on the ECS shelf. Although the RMSE for  $pH_T$  we obtained here was higher than obtained in some previous studies (e.g., Juraneck et al., 2011; Williams et al., 2016; Sauzède et al., 2017), their research regions were open ocean regions, not coastal seas. For example, Juraneck et al. (2011) developed empirical algorithms to estimate pH with RMSE of 0.018 for data between 30-500 m in the NE subarctic Pacific; Williams et al. (2016) also developed empirical algorithms to predict pH with RMSE of 0.01 in the Southern Ocean; Sauzède et al. (2017) developed a neural network method to estimate pH with RMSE of 0.02 in the global ocean. Here the CANYON model developed by Sauzède et al. (2017) was applied to exploratory dataset (Fig. 8b), showed a RMSE of 0.09 and MAE of 0.06. It demonstrated that the ANN model presented here outperformed the CANYON model developed for the global ocean for predicting  $pH_T$  on the ECS shelf, where carbon chemistry parameters are not only under the direct impact of Taiwan Warm Current and remote control of the Kuroshio water intrusion into the shelf but also significantly controlled by seasonal variations of the Changjiang discharge (e.g., Isobe and Matsuno, 2008; Chen et al., 2008; Chou et al., 2009). Taking into account the highly complex hydrographic, biological and chemical conditions, the accuracy of  $pH_T$  presented is promising.~~

### 3.3 ~~Variable importance in the ANN model~~ ANN model sensitivity to environmental input variables

To assess the ~~ANN model sensitivity to relative importance of~~ different environmental input variables ~~in the ANN model~~, we used the following method: for each environmental variable separately, add 5% and calculate the resulting percentage change in the predicted  $pH_T$ . ~~It was found that the ANN model responded to T, DO, and Si in a positive way, S and P in a negative way, was insensitive to N (Fig. 9) Predicted  $pH_T$  responded positively to (T, DO) and negatively to S (Fig. 8).~~ The variable with the greatest ~~weight sensitivity~~ was DO, followed by S and T, and the ~~weights sensitivity~~ of nutrients were relatively small. ~~It suggested that the more accurate the input variables T, S, and DO, the closer  $pH_T$  predicted by the ANN model is to the real.~~ ~~The ANN model showed ~0.23%  $pH_T$  increase for 5% DO added, which reflected This is consistent with (Cai et al., 2011) where positive correlations between  $pH_T$  and DO (Cai et al., 2011), in the Gulf of Mexico and ECS were which attributed to the processes of photosynthesis (generating DO and removing  $CO_2$ , hence increasing pH) and aerobic respiration (consuming DO and generating  $CO_2$ , hence lowering pH). The ANN model showed ~0.07%  $pH_T$  decrease for 5% S added. The negative response to increasing S reflects the influence of the Changjiang River discharge (lower salinity), which carries large amounts~~

205 of nutrients that fuel increased primary production (uptake of nutrients and CO<sub>2</sub>, hence raising the pH) in surface waters during warm seasons (Gong et al., 2011).

### 3.4 ANN model application

In order to retrieve [monthly](#) pH<sub>T</sub> on the ECS shelf, the monthly T, S, DO, N, P and Si from the Changjiang Biology Finite-Volume Coastal Ocean Model (FVCOM) (<http://47.101.49.44/wms/demo>) were applied to the ANN model as input variables.

210 ~~Monthly pH<sub>T</sub> for the period 2000–2016 was obtained at the spatial resolution of the Changjiang Biology FVCOM output: 1–10 km in the horizontal, 10 depth levels in the vertical, and 12 months.~~ We compared [monthly input variables from the Changjiang Biology FVCOM](#) with the corresponding observations at the surface and bottom (Fig. S2), it was found that simulated T and S were close to the observed value, simulated DO was high than the measured value at the bottom, simulated nutrients were high than the observed value at the surface. We also compared [monthly average pH<sub>T</sub> provided by the Changjiang Biology FVCOM](#) with pH<sub>T</sub> retrieved by the ANN model using the Changjiang Biology FVCOM output at the surface and bottom on the ECS shelf (Fig. 3S), it showed that the ANN model can potentially provide a more accurate pH<sub>T</sub>. The possible reason was [that the carbonate system from the Changjiang Biology FVCOM was not optimized due to challenges obtaining sufficient boundary information.](#)

Considering the discreteness and discontinuity of the sampling sites, we compared ~~retrieved~~ pH<sub>T</sub> [retrieved by the ANN model using the Changjiang Biology FVCOM output](#) with the corresponding observations at some sites with repeated sampling for 3 to 4 years. These sites were A1-5 (123.0140°E, 32.2145°N), A1-6 (123.2750°E, 32.2679°N), A6-7 (122.9880°E, 30.7050°N), A6-9 (123.4990°E, 30.5723°N), A7-5 (123.4990°E, 30.2523°N), and A8-5 (123.4930°E, 29.9940°N). Overall, the retrieved pH<sub>T</sub> ~~from the Changjiang Biology FVCOM output~~ agrees well with the observed values at the surface, except for three samples in summer (Fig. 9|10). There are relatively large deviations (greater than the RMSE of 0.04) in August 2013 at station A1-5 and A6-9, and in July 2016 at station A8-5. ~~These may be primarily attributed to the sudden increase in the Changjiang River discharge (Dai and Trenberth, 2002).~~ To illustrate the application performance in the water column, a scatterplot of retrieved pH<sub>T</sub> vs observations at six sites with repeated sampling for 3 to 4 years (Fig. 10|1) shows that the ANN model predicts pH<sub>T</sub> with a RMSE of 0.05 and R<sup>2</sup> of 0.71.

225

We further compared [monthly](#) retrieved pH<sub>T</sub> [by the ANN model](#) using the Changjiang Biology FVCOM output with ~~retrieved~~ pH<sub>T</sub> ~~using measured T, S and DO, and~~ in situ measured pH<sub>T</sub> values (Figure 1|2). The agreement is good here in winter, but large deviations appear in summer. The reduced performance in summer can be attributed in large part a reduced performance of the FVCOM model in predicting summertime [input variables](#) DO and S (see Figure S1|3); ~~using the observed values of DO, S, etc. as predictor variables, the skill of the ANN pH<sub>T</sub> predictions is much improved (RMSE = 0.09 vs. RMSE = 0.02).~~

230

### 4 [Summary and c](#)Conclusions ~~and perspectives~~

235 We have developed an artificial neural network model, demonstrated its reliability, and used it to retrieve monthly pH<sub>T</sub> for the period 2000–2016 on the East China Sea shelf. ~~This model predicts the water column pH<sub>T</sub> using nine input components, and the three most important environmental input variables were dissolved oxygen, salinity and temperature.~~ [We trained this ANN model using 11 cruise datasets from 2013 to 2017. In order to choose the optimal architecture of the ANN model, we tested different training and transfer functions, the number of neurons in two hidden layers, and different combinations of input variables. We also validated the reliability of the ANN model with a root mean square error accuracy of 0.04 using three cruises in 2018 as exploratory dataset. The environmental input variable with the greatest sensitivity was dissolved oxygen, followed by salinity and temperature. We retrieved monthly pH<sub>T</sub> by the ANN model using input variables from the Changjiang Biology Finite-Volume Coastal Ocean Model \(FVCOM\).](#)

240

The approach has several potential applications. First, it can provide estimates of seawater  $\text{pH}_T$  with known accuracies for the East China Sea shelf and the period 2013-2018. Within this region the model could be used as a cost-effective way to handle restrictions of marine observations conducted from ships, such as coarse resolution and under-sampling of carbonate system variables. Second, while the ANN model is not a replacement for direct measurements of the carbonate system, it may be a valuable tool for understanding the seasonal variation of  $\text{pH}_T$  in poorly observed regions. Third, this approach can be applied to other regions to predict pH by suitably adapting the input variables and network structure. The MATLAB code used in this study to develop and apply the ANN model is freely available, and is accompanied by a README file providing detailed guidance on how to use and adapt the code.

### Code and data availability

Matlab code of the ANN model for  $\text{pH}_T$  estimation and datasets are available:

<http://doi.org/10.5281/zenodo.3519219>

The monthly-average input variables (T, S, DO, N, P, Si) from the Changjiang Biology Finite-Volume Coastal Ocean Model and retrieved  $\text{pH}_T$  values from 2000 to 2016 on the East China Sea shelf and three cruises data during 2018 used to evaluate the ANN model are available:

<http://doi.org/10.5281/zenodo.3519236>

Requests to access the raw data should be directed to Richard Bellerby: [Richard.Bellerby@niva.no](mailto:Richard.Bellerby@niva.no)

Six stations with repeated sampling for 3 to 4 years and corresponding retrieved pH values from the Changjiang Biology FVCOM output are available: <http://doi.org/10.5281/zenodo.3491747>

### Video supplement

Monthly distribution of surface  $\text{pH}_T$  on the East China Sea shelf from 2000 to 2016 year:

<http://doi.org/10.5281/zenodo.2672943>

Profile distribution of  $\text{pH}_T$  at  $31^\circ\text{N}$  on the East China Sea shelf from 2000 to 2016 year:

<http://doi.org/10.5281/zenodo.2672929>

### Author contribution

Li, X. S. and Bellerby, R. contributed to the development of methodology and the design of the model. Ge, J. Z. provided ten cruises dataset from 2013 to 2017 year and the input variables from the Changjiang Biology Finite-Volume Coastal Ocean Model Data. Liu, J. and Yang, A. Q. provided four cruises dataset from 2017 to 2018 year. Li, X. S. developed the manuscript with contributions from all co-authors.

### Acknowledgements

This study was financially supported by the National Thousand Talents Program for Foreign Experts (grants No. WQ20133100150), Vulnerabilities and Opportunities of the Coastal Ocean (grants No. SKLEC-2016RCDW01), Marginal Seas (MARSEAS) (grants SKLEC-Taskteam project), and Innovative Talents International Cooperation Training Project (grants No. China Scholarship Council-201913045). Richard Bellerby and Philip Wallhead were also supported by funding from the FRAM High North Research Centre for Climate and the Environment under the Ocean Acidification Flagship and the NIVA Land-Ocean Interactions Strategic Institute program. We deeply thank the people who worked on the cruises and in the laboratory.

- Alin, S. R., Feely, R. A., Dickson, A. G., Hernández-Ayón, J. M., Juranek, L. W., Ohman, M. D., and Goericke, R.: Robust empirical relationships for estimating the carbonate system in the southern California Current System and application to CalCOFI hydrographic cruise data (2005–2011), *J. Geophys. Res.*, 117, C05033, doi:10.1029/2011JC007511, 2012.
- Bai, Y., Cai, W. J., He, X. Q., Zhai, W. D., Pan, D., Dai, M. H., and Yu, P. S.: A mechanistic semi-analytical method for remotely sensing sea surface pCO<sub>2</sub> in river-dominated coastal oceans: A case study from the East China Sea, *J. Geophys. Res. Oceans*, 120, 2331–2349, doi:10.1002/2014JC010632, 2015.
- Bates, N. R., Astor, Y. M., Church, M. J., Currie, K., Dore, J. E., González-Dávila, M., Lorenzoni, L., Muller-Karger, F., Olafsson, J., and Santana-Casiano, J. M.: A time-series view of changing ocean chemistry due to ocean uptake of anthropogenic CO<sub>2</sub> and ocean acidification, *Oceanography*, 27(1), 126–141, doi:10.5670/oceanog.2014.16, 2014.
- Bostock, H. C., Mikaloff Fletcher, S. E., and Williams, M. J. M.: Estimating carbonate parameters from hydrographic data for the intermediate and deep waters of the Southern Hemisphere oceans, *Biogeosciences*, 10, 6199–6213, <https://doi.org/10.5194/bg-10-6199-2013>, 2013.
- Cai, W. J., Hu, X. P., Huang W. J., Murrell, M. C., Lehrter, J. C., Lohrenz, S. E., Chou, W. C., Zhai, W. D., Hollibaugh, J. T., Wang, Y. C., Zhao, P. S., Guo, X. H., Gundersen, K., Dai, M. H., and Gong, G. C.: Acidification of subsurface coastal waters enhanced by eutrophication, *Nature Geoscience*, 4, 766–770, doi:10.1038/NGEO1297, 2011.
- Cao, Z. M., Dai, M. H., Zheng, N., Wang, D., Li, Q., Zhai, W. D., Meng, F. F., and Gan, J. P.: Dynamics of the carbonate system in a large continental shelf system under the influence of both a river plume and coastal upwelling, *J. Geophys. Res.*, 116, G02010, doi:10.1029/2010JG001596, 2011.
- Carter, B. R., Feely, R. A., Williams, N. L., Dickson, A. G., Fong, M. B., and Takeshita, Y.: Updated methods for global locally interpolated estimation of alkalinity, pH, and nitrate, *Limnol. Oceanogr. Methods*, 16, 119–131, doi:10.1002/lom3.10232, 2018.
- Carter, B. R., Williams, N. L., Gray, A. R., and Feely, R. A.: Locally interpolated alkalinity regression for global alkalinity estimation, *Limnol. Oceanogr. Methods*, 14, 268–277, doi:10.1002/lom3.10087, 2016.
- Chen, C. S., Xue, P. F., Ding, P. X., Beardsley, R. C., Xu, Q. C., Mao, X. M., Gao, G. P., Qi, J. H., Li, C. Y., Lin, H. C., Cowles, G., and Shi, M. C.: Physical mechanisms for the offshore detachment of the Changjiang Diluted Water in the East China Sea, *J. Geophys. Res.*, 113, C02002, doi:10.1029/2006JC003994, 2008.
- Chen, S. L. and Hu, C. M.: Estimating sea surface salinity in the northern Gulf of Mexico from satellite ocean color measurements, *Remote Sens Environ*, 201, 115–132, <https://doi.org/10.1016/j.rse.2017.09.004>, 2017.
- Chou, W. C., Gong, G. C., Sheu, D. D., Hung, C. C., and Tseng, T. F.: Surface distributions of carbon chemistry parameters in the East China Sea in summer 2007, *J. Geophys. Res.*, 114, C07026, doi:10.1029/2008JC005128, 2009.
- Ciais, P., Sabine, C., Bala, G., Bopp, L., Brovkin, V., Canadell, J., Chhabra, A., DeFries, R., Galloway, J., Heimann, M., Jones, C., Le Quéré, C., Myneni, R. B., Piao, S., and Thornton, P.: Carbon and Other Biogeochemical Cycles. In: *Climate Change 2013: The Physical Science Basis. Contribution of Working Group I to the Fifth Assessment Report of the Intergovernmental Panel on Climate Change* [Stocker, T. F., D. Qin, G. K. Plattner, M. Tignor, S. K. Allen, J. Boschung, A. Nauels, Y. Xia, V. Bex and P. M. Midgley (eds.)]. Cambridge University Press, Cambridge, United Kingdom and New York, NY, USA, 2013.
- Dai, A. and Trenberth, K. E.: Estimates of freshwater discharge from continents: Latitudinal and seasonal variations, *J. Hydrometeorol.*, 3, 660–687, <https://doi.org/10.1175/1525-7541>, 2002.
- Dore, J., Lukas, R., Sadler, D., Church, M., and Karl, D.: Physical and biogeochemical modulation of ocean acidification in the central North Pacific, *Proc. Natl. Acad. Sci. U. S. A.*, 106, 12235–12240, 2009.
- Friedrich, T. and Oschlies, A.: Neural network-based estimates of North Atlantic surface pCO<sub>2</sub> from satellite data: A methodological study, *J. Geophys. Res.*, 114, C03020, <https://doi.org/10.1029/2007JC004646>, 2009.



- Gong, G. C., Chen, Y. L. L., and Liu, K. K.: Chemical hydrography and chlorophyll a distribution in the East China Sea in summer: implications in nutrient dynamics, *Cont. Shelf Res.*, **16**, 1561–1590, [https://doi.org/10.1016/0278-4343\(96\)00005-2](https://doi.org/10.1016/0278-4343(96)00005-2), 1996.
- 325 Gong, G. C., Liu, K. K., Chiang, K. P., Hsiung, T. M., Chang, J., Chen, C. C., Hung, C. C., Chou, W. C., Chung, C. C., Chen, H. Y., Shiah, F. K., Tsai, A. Y., Hsieh, C. H., Shiao, J. C., Tseng, C. M., Hsu, S. C., Lee, H. J., Lee, M. A., Lin, I. I., and Tsai, F.: Yangtze River floods enhance coastal ocean phytoplankton biomass and potential fish production, *Geophys. Res. Lett.*, **38**, L13603, doi:10.1029/2011GL047519, 2011.
- González-Dávila, M., Santana-Casiano, J. M., Rueda, M. J., and Llinás, O.: The water column distribution of carbonate system  
330 variables at the ESTOC site from 1995 to 2004, *Biogeosciences*, **7**, 3067–3081, 2010.
- Guo, X. H., Zhai, W. D., Dai, M. H., Zhang, C., Bai, Y., Xu, Y., Li, Q., and Wang, G. Z.: Air–sea CO<sub>2</sub> fluxes in the East China Sea based on multiple-year underway observations, *Biogeosciences*, **12**, 5495–5514, doi:10.5194/bg-12-5495-2015, 2015.
- [Ichikawa, H. and Beardsley, R. C.: The Current System in the Yellow and East China Seas, \*J. Oceanogr.\*, \*\*58\*\*, 77–92, https://doi.org/10.1023/A:1015876701363, 2002.](https://doi.org/10.1023/A:1015876701363)
- 335 ~~Hornik, K., Stinchcombe, M., and White, H.: Multilayer feedforward networks are universal approximators, *Neural Netw.*, **2**, 359–366, https://doi.org/10.1016/0893-6080(89)90020-8, 1989.~~
- Isobe, A. and Matsuno, T.: Long-distance nutrient-transport process in the Changjiang River plume on the East China Sea shelf in summer, *J. Geophys. Res.-Oceans*, **113**, C04006, doi:10.1029/2007JC004248, 2008.
- Juranek, L. W., Feely, R. A., Gilbert, D., Freeland, H., and Miller, L. A.: Real-time estimation of pH and aragonite saturation  
340 state from Argo profiling floats: Prospects for an autonomous carbon observing strategy, *Geophys. Res. Lett.*, **38**, L17603, doi:10.1029/2011GL048580, 2011.
- Laruelle, G. G., Landschützer, P., Gruber, N., Tison, J. L., Delille, B., and Regnier, P.: Global high-resolution monthly pCO<sub>2</sub> climatology for the coastal ocean derived from neural network interpolation, *Biogeosciences*, **14**, 4545–4561, doi:10.5194/bg-14-4545-2017, 2017.
- 345 Lauvset, S. K., Gruber, N., Landschützer, P., Olsen, A., and Tjiputra, J.: Trends and drivers in global surface ocean pH over the past 3 decades, *Biogeosciences*, **12**(5), 1285–1298, doi:10.5194/bg-12-1285-2015, 2015.
- Le Quéré, C., Andrew, R. M., Friedlingstein, P., Sitch, S., Hauck, J., Pongratz, J., and Pickers, P. A., et al.: Global Carbon Budget 2018, *Earth Syst. Sci. Data*, **10**, 2141–2194, <https://doi.org/10.5194/essd-10-2141-2018>, 2018.
- [Lie, H. J. and Cho, C. H.: Seasonal circulation patterns of the Yellow and East China Seas derived from satellite-tracked drifter trajectories and hydrographic observations, \*Prog. Oceanogr.\*, \*\*146\*\*, 121–141, http://dx.doi.org/10.1016/j.pocean.2016.06.004, 2016.](http://dx.doi.org/10.1016/j.pocean.2016.06.004)
- 350 Lueker, T. J., Dickson, A. G., and Keeling, C. D.: Ocean pCO<sub>2</sub> calculated from dissolved inorganic carbon, alkalinity, and equations for K<sub>1</sub> and K<sub>2</sub>: Validation based on laboratory measurements of CO<sub>2</sub> in gas and seawater at equilibrium, *Mar. Chem.*, **70**, 105–119, doi:10.1016/S0304-4203(00)00022-0, 2000.
- 355 Moore-Maley, B. L., Allen, S. E., and Ianson, D.: Locally driven interannual variability of near-surface pH and  $\Omega_A$  in the Strait of Georgia, *J. Geophys. Res. Oceans*, **121**, 1600–1625, doi:10.1002/2015JC011118, 2016.
- Olden, J. D. and Jackson, D. A.: Illuminating the “black box”: a randomization approach for understanding variable contributions in artificial neural networks, *Ecol. Model.*, **154**, 135–150, [https://doi.org/10.1016/S0304-3800\(02\)00064-9](https://doi.org/10.1016/S0304-3800(02)00064-9), 2002.
- Olden, J. D., Joy, M. K., and Death, R. G.: An accurate comparison of methods for quantifying variable importance in artificial  
360 neural networks using simulated data, *Ecol. Model.*, **178**, 389–397, <https://doi.org/10.1016/j.ecolmodel.2004.03.013>, 2004.
- Palacz, A. P., John, M. A. S., Brewin, R. J. W., Hirata, T., and Gregg, W. W.: Distribution of phytoplankton functional types in high-nitrate, low-chlorophyll waters in a new diagnostic ecological indicator model, *Biogeosciences*, **10**, 8103–8157, <https://doi.org/10.5194/bgd-10-8103-2013>, 2013.

- ~~Pelletier, G. J., Lewis, E., and Wallace, D. W. R.: CO2SYS.XLS: A calculator for the CO<sub>2</sub> system in seawater for Microsoft Excel/VBA, Ver. 16, Washington State Department of Ecology, Olympia, Washington, 2011.~~
- 365 Qu, B. X., Song, J. M., Yuan, H. M., Li, X. G., Li, N., Duan, L. Q., Chen, X., and Lu, X.: Summer carbonate chemistry dynamics in the Southern Yellow Sea and the East China Sea: Regional variations and controls, *Cont. Shelf Res.*, 111, 250–261, <https://doi.org/10.1016/j.csr.2015.08.017>, 2015.
- 370 Raitos, D. E., Lavender, S. J., Maravelias, C. D., Haralabous, J., Richardson, A. J., and Reid, P. C.: Identifying four phytoplankton functional types from space: an ecological approach, *Limnol. Oceanogr.*, 53, 605–613, <https://doi.org/10.4319/lo.2008.53.2.0605>, 2008.
- Reggiani, E. R., King, A. L., Norli, M., Jaccard, P., Sorensen, K., and Bellerby, R. G. J.: FerryBox-assisted monitoring of mixed layer pH in the Norwegian Coastal Current, *Journal of Marine Systems*, 162, 29–36, doi:10.1016/j.jmarsys.2016.03.017, 2016.
- 375 Sabine, C. L., Feely, R. A., Gruber, N., Key, R. M., Lee, K., Bullister, J. L., Wanninkhof, R., Wong, C. S., Wallace, D. W. R., Tilbrook, B., Millero, F. J., Peng, T. H., Kozyr, A., Ono, T., Rios, A. F.: The oceanic sink for anthropogenic CO<sub>2</sub>, *Science*, 305, 367–371, 2004.
- Sasse, T. P., McNeil, B. I., and Abramowitz, G.: A novel method for diagnosing seasonal to inter-annual surface ocean carbon dynamics from bottle data using neural networks, *Biogeosciences*, 10, 4319–4340, doi:10.5194/bg-10-4319-2013, 2013.
- 380 Sauzède, R., Bittig, H. C., Claustre, H., de Fommervault, O. P., Gattuso, J. P., Legendre, L., and Johnson, K. S.: Estimates of Water-Column Nutrient Concentrations and Carbonate System Parameters in the Global Ocean: A Novel Approach Based on Neural Networks, *Front. Mar. Sci.*, 4, 128, doi:10.3389/fmars.2017.00128, 2017.
- Sauzède, R., Claustre, H., Jamet, C., Uitz, J., Ras, J., Mignot, A., and D’Ortenzio, F.: Retrieving the vertical distribution of chlorophyll-a concentration and phytoplankton community composition from in situ fluorescence profiles: a method based on
- 385 a neural network with potential for global-scale applications, *J. Geophys. Res. Ocean*, 120, 451–470, doi:10.1002/2014JC010355, 2015.
- Sauzède, R., Claustre, H., Uitz, J., Jamet, C., Dall’Olmo, G., D’Ortenzio, F., Gentili, B., Poteau, A., and Schmechtig, C.: A neural network-based method for merging ocean color and Argo data to extend surface bio-optical properties to depth: retrieval of the particulate backscattering coefficient, *J. Geophys. Res. Ocean*, 121, 2552–2571, doi:10.1002/2015JC011408, 2016.
- 390 Shim, J. H., Kim, D., Kang, Y. C., Lee, J. H., Jang, S. T., and Kim, C. H.: Seasonal variations in pCO<sub>2</sub> and its controlling factors in surface seawater of the northern East China Sea, *Cont. Shelf Res.*, 27, 2623–2636, <https://doi.org/10.1016/j.csr.2007.07.005>, 2007.
- Tamura, S. and Tateishi, M.: Capabilities of a Four-Layered Feedforward Neural Network: Four Layers versus Three, *IEEE Transactions on Neural Networks*, 8, 251–255, doi:10.1109/72.557662, 1997.
- 395 Uusitalo, L.: Advantages and challenges of Bayesian networks in environmental modelling, *Ecol. Model*, 203, 312–318, <https://doi.org/10.1016/j.ecolmodel.2006.11.033>, 2007.
- Velo, A., Pérez, F. F., Tanhua, T., Gilcoto, M., Ríos, A. F., and Key, R. M.: Total alkalinity estimation using MLR and neural network techniques, *J Marine Syst*, 111–112, 11–18, <https://doi.org/10.1016/j.jmarsys.2012.09.002>, 2013.
- Williams, N. L., Juranek, L. W., Johnson, K. S., Feely, R. A., Riser, S. C., Talley, L. D., Russell, J. L., Sarmiento, J. L., and
- 400 Wanninkhof, R.: Empirical algorithms to estimate water column pH in the Southern Ocean, *Geophys. Res. Lett.*, 43, 3415–3422, doi:10.1002/2016GL068539, 2016.
- Wootton, J. T., Pfister, C. A., and Forester, J. D.: Dynamic patterns and ecological impacts of declining ocean pH in a high resolution multi-year dataset, *Proc. Natl. Acad. Sci. U. S. A.*, 105, 18848–18853, <https://doi.org/10.1073/pnas.0810079105>, 2008.
- 405 Wootton, J. T. and Pfister, C. A.: Carbon System Measurements and Potential Climatic Drivers at a Site of Rapidly Declining Ocean pH, *PLoS ONE*, 7(12): e53396, <https://doi.org/10.1371/journal.pone.0053396>, 2012.



Zhai, W. D. and Dai, M. H.: On the seasonal variation of air-sea CO<sub>2</sub> fluxes in the outer Changjiang (Yangtze River) Estuary, East China Sea, *Mar. Chem.*, 117, 2–10, <https://doi.org/10.1016/j.marchem.2009.02.008>, 2009.

Zhai, W. D., Zhao, H. D., Zheng, N., and Xu, Y.: Coastal acidification in summer bottom oxygen-depleted waters in northwestern-northern Bohai Sea from June to August in 2011, *Chinese Science Bulletin*, 57, 1062-1068, doi:10.1007/s11434-011-4949-2, 2012.

Zhai, W. D., Zheng, N., Huo, C., Xu, Y., Zhao, H. D., Li, Y. W., Zang, K. P., Wang, J. Y., and Xu, X. M.: Subsurface pH and carbonate saturation state of aragonite on the Chinese side of the North Yellow Sea: seasonal variations and controls, *Biogeosciences*, 11, 1103-1123, <https://doi.org/10.5194/bg-11-1103-2014>, 2014.

Zhang, G., Zhang, J., and Liu, S. M.: Characterization of nutrients in the atmospheric wet and dry deposition observed at the two monitoring sites over Yellow Sea and East China Sea, *J Atmos Chem.*, 57(1), 41-57, doi:10.1007/s10874-007-9060-3, 2007.

420

425

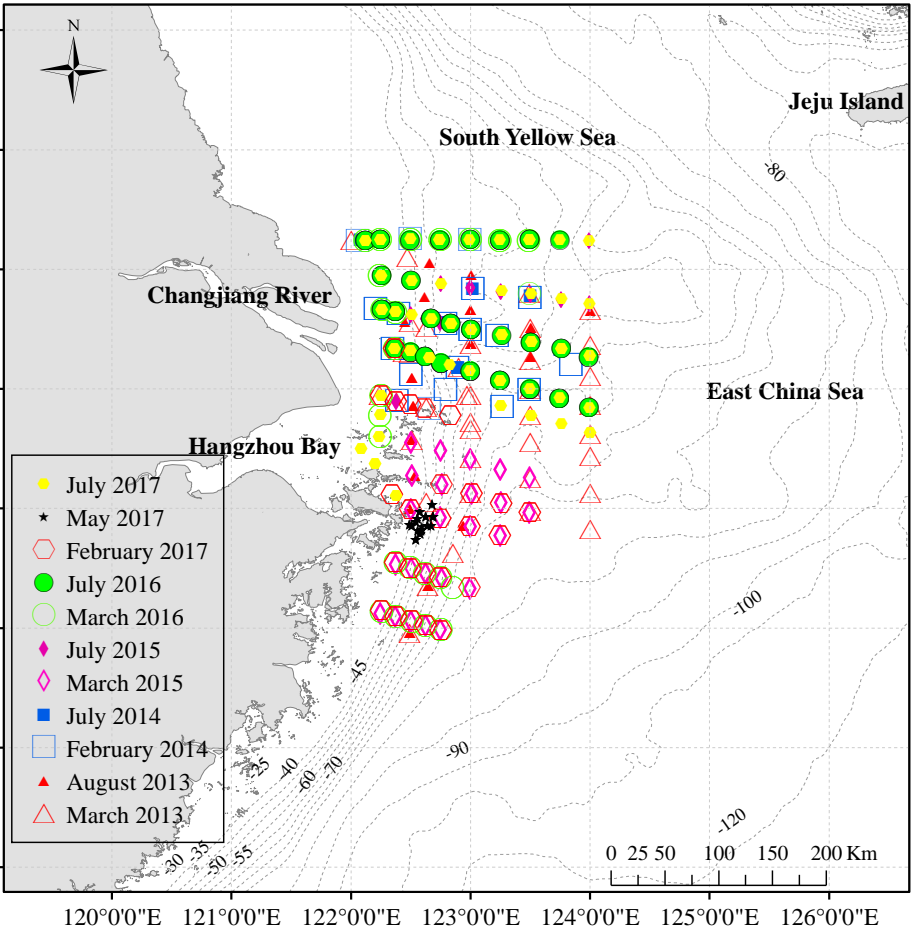

Figure 2: Sampling stations ~~from~~ during 11 cruises (as confirmatory dataset) from 2013 to 2017 on the East China Sea shelf.

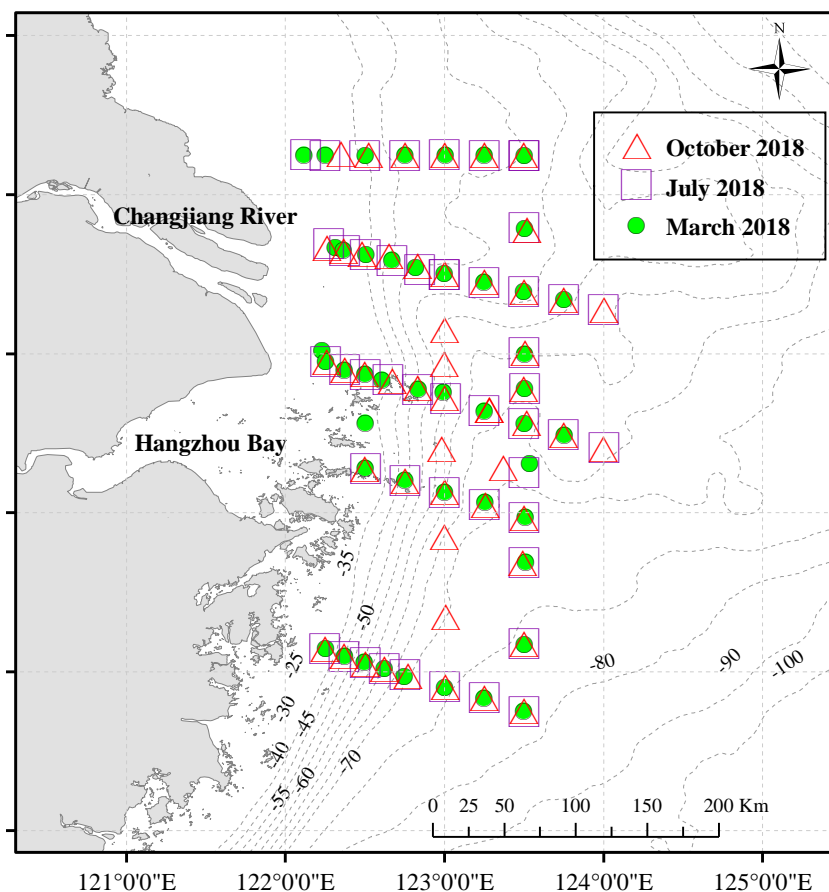

Figure 2: Sampling stations for three cruises (as exploratory dataset) used to extend the utility of the ANN model. The green circles represent March 2018, the purple squares represent July 2018, the red triangles represent October 2018.

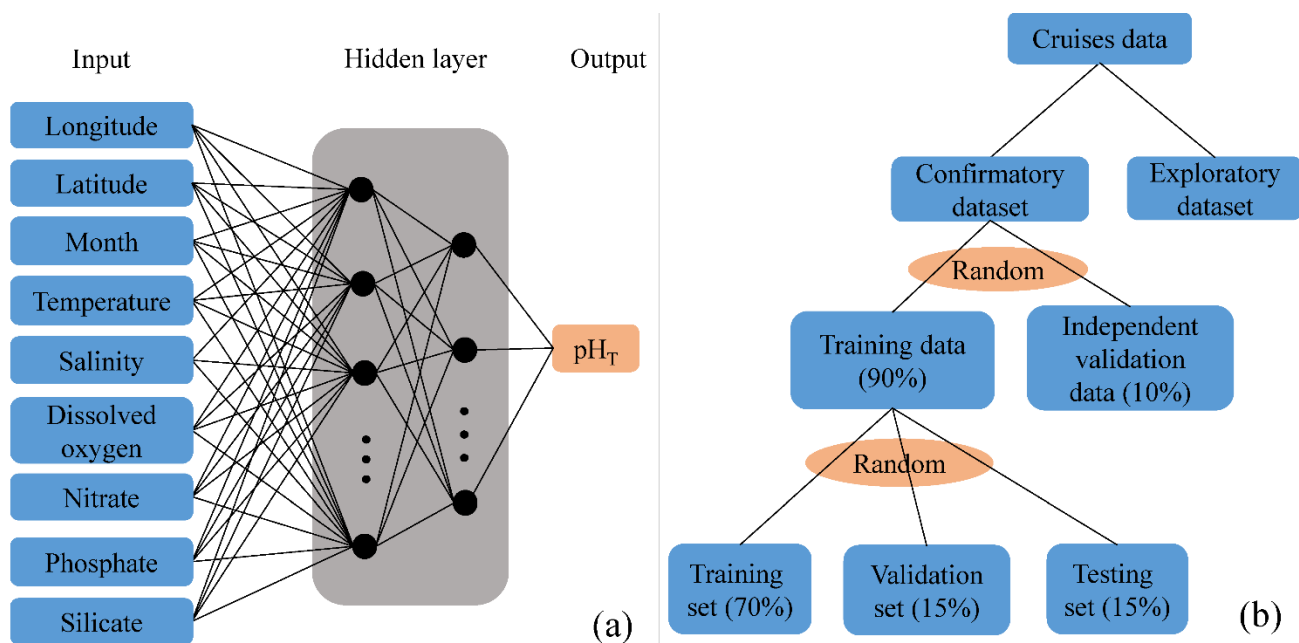

Figure 3: Schematic representation of the neural network algorithm to retrieve  $pH_T$ . (a)-the architecture of the ANN model. Input variables are observed temperature, salinity, dissolved oxygen, nitrate, phosphate, and silicate together with the geolocation (longitude and latitude) and time (month) of sampling; (b)-data distribution diagram for training and prediction.

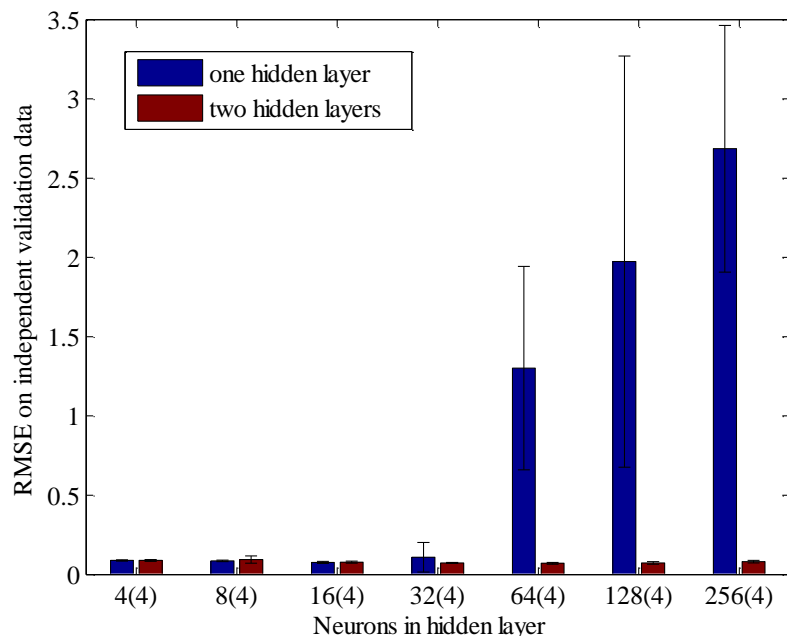

**Figure 4: Comparison of the performance of one hidden layer and two hidden layers on independent validation data. The result displayed are the mean and standard deviation of ten-fold cross-validation for each number of neurons in the hidden layer. The number in parentheses presents the number of neurons in the second hidden layer for two hidden layers.**

440

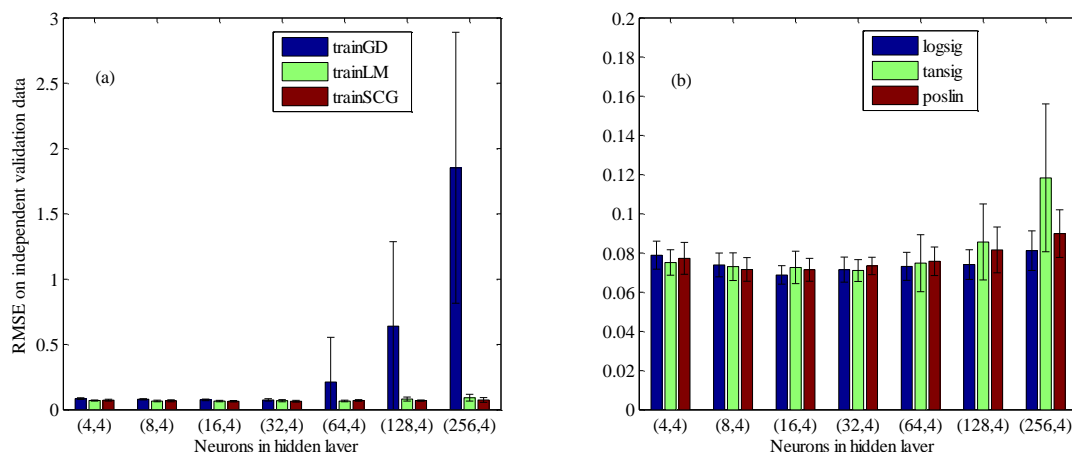

**Figure 5: Comparison of the performance of different training functions and transfer functions on independent validation data. (a)-three training functions: Gradient descent backpropagation (trainGD), Levenberg-Marquardt backpropagation (trainLM), Scaled conjugate gradient backpropagation (trainSCG); (b) three transfer functions: Log-sigmoid transfer function (logsig), Hyperbolic tangent sigmoid transfer function (tansig); Positive linear transfer function (poslin). The result displayed are the mean and standard deviation of ten-fold cross-validation for each number of neurons in the hidden layer.**

445

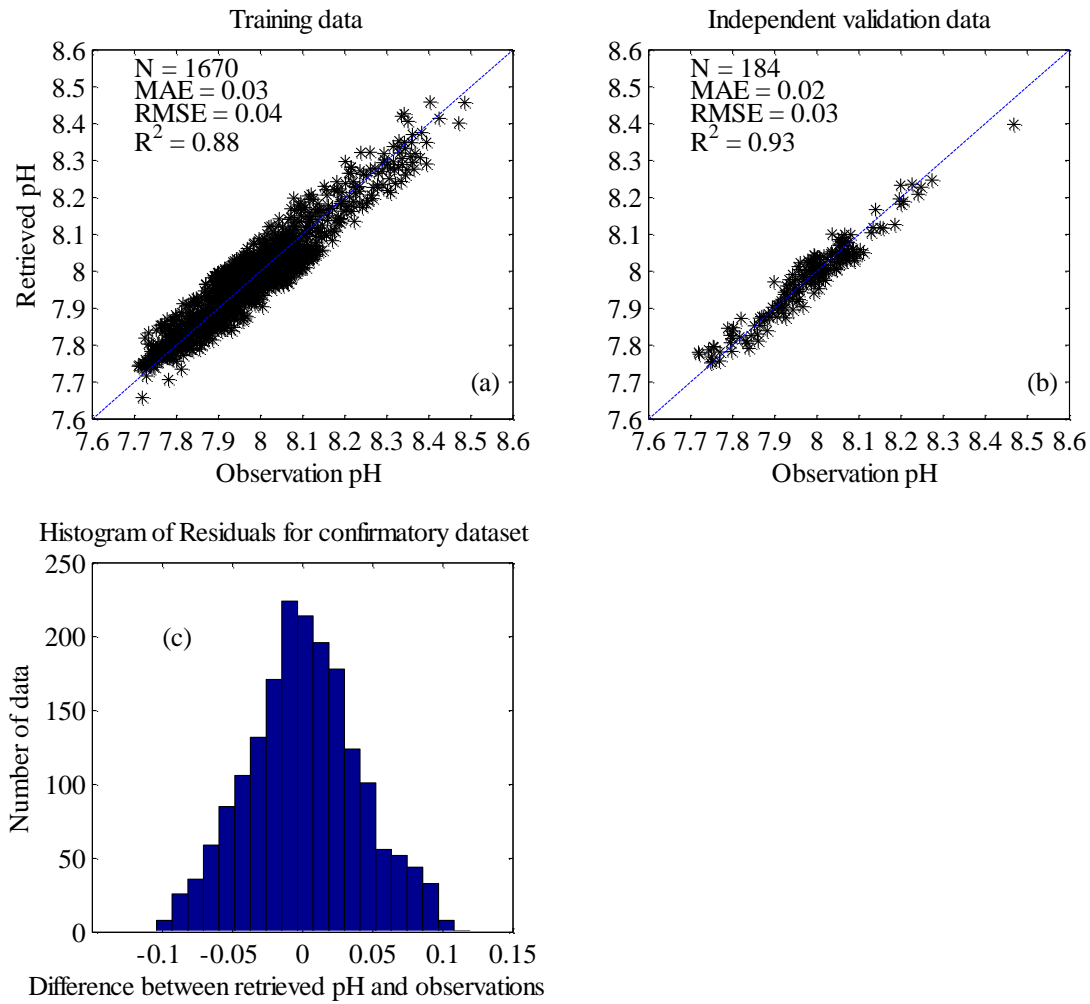

**Figure 6: Comparison of  $pH_T$  retrieved by the ANN model with corresponding observations. (a)-Training data (90% of confirmatory dataset); (b)-Independent validation data (10% of confirmatory dataset); (c)-Histogram of residuals for confirmatory dataset. The 1:1 line is shown in each plot as visual reference. Three statistics are the mean absolute error (MAE), the coefficient of determination ( $R^2$ ), and the root mean squared error (RMSE). N represents the number of data points.**

450

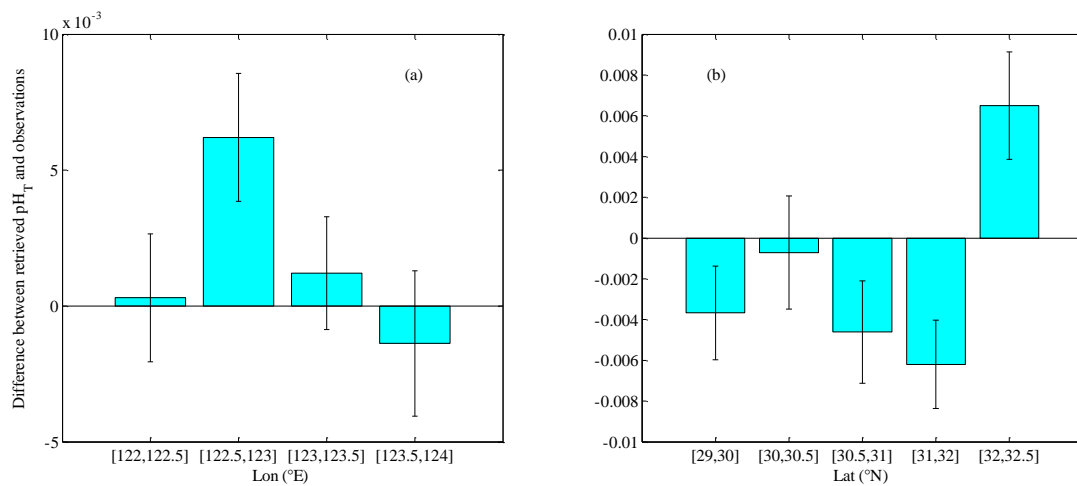

**Figure 7: Box plots of the differences between retrieved  $pH_T$  minus the observations. (a)-the differences vs longitude (Mean $\pm$ SE); (b)-the differences vs latitude (Mean $\pm$ SE). The height of each box represents the mean value of the differences, the whisker represents the standard error (SE) value of the differences.**

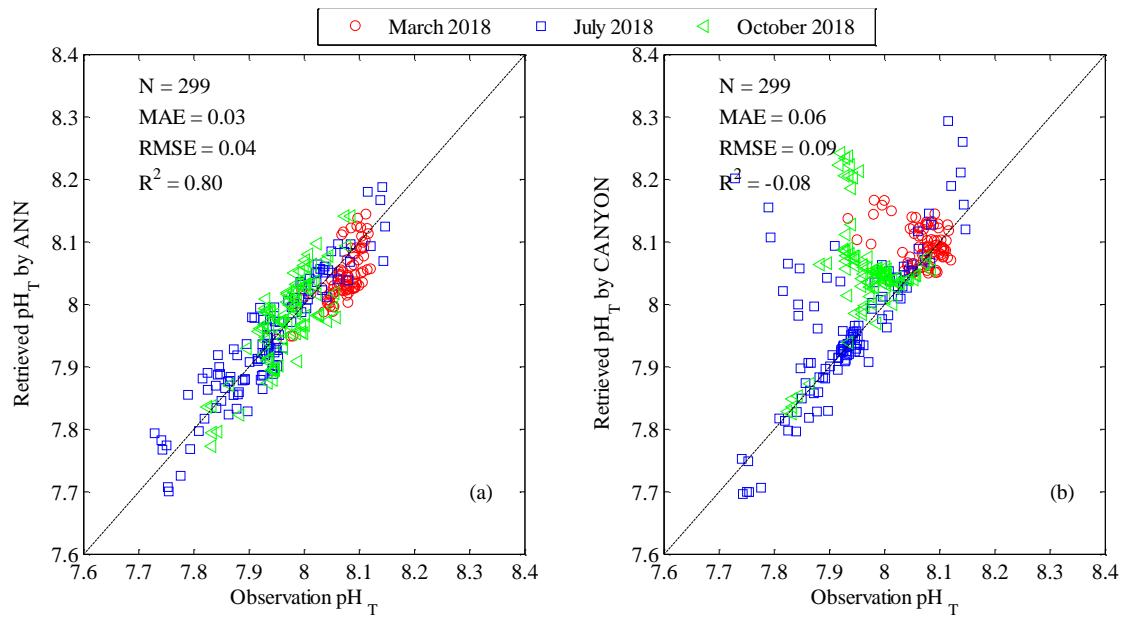

455 **Figure 8: Comparison of retrieved  $\text{pH}_T$  with corresponding observations for exploratory dataset. (a)- $\text{pH}_T$  retrieved by the ANN model vs observations; (b)- $\text{pH}_T$  retrieved by CANYON (Sauzède et al., 2017) vs observations.** The red circles represent March 2018, the blue squares represent July 2018, the green triangles represent October 2018. The 1:1 line is shown in the plot as visual reference. Three statistics approaches used are the mean absolute error (MAE), the coefficient of determination ( $R^2$ ), and the root mean squared error (RMSE). N represents the number of data points.

460

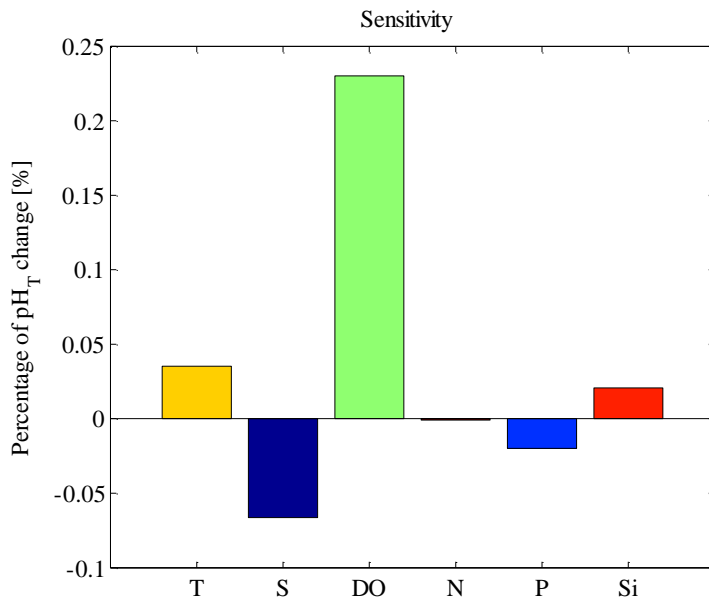

**Figure 9: Sensitivity of the ANN model for environmental input variables: temperature (T), salinity (S), dissolved oxygen (DO), nitrate (N), phosphate (P) and silicate (Si).**

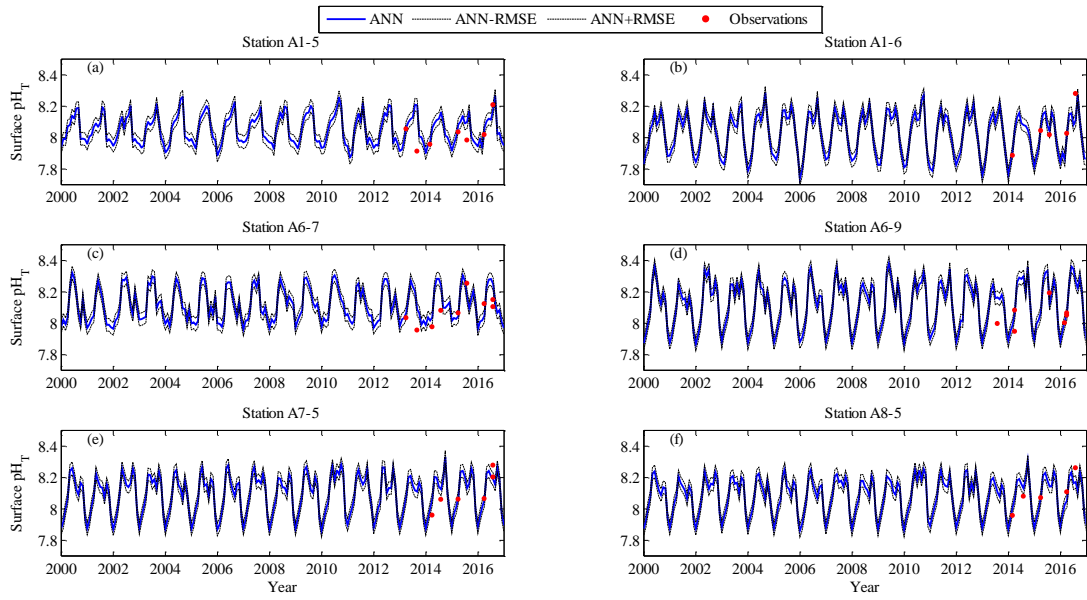

**Figure 10: Comparison of surface  $pH_T$  retrieved by the ANN model using Changjiang Biology FVCOM output with corresponding observations at six sites repeated sampling for 3 to 4 years. Red dots represent observations  $pH_T$ , blue solid line represents retrieved  $pH_T$ , black dotted line represent retrieved  $pH_T \pm RMSE$ . (a)-station A1-5; (b)-station A1-6; (c)-station A6-7; (d)-station A6-9; (e)-station A7-5; (f)-station A8-5.**

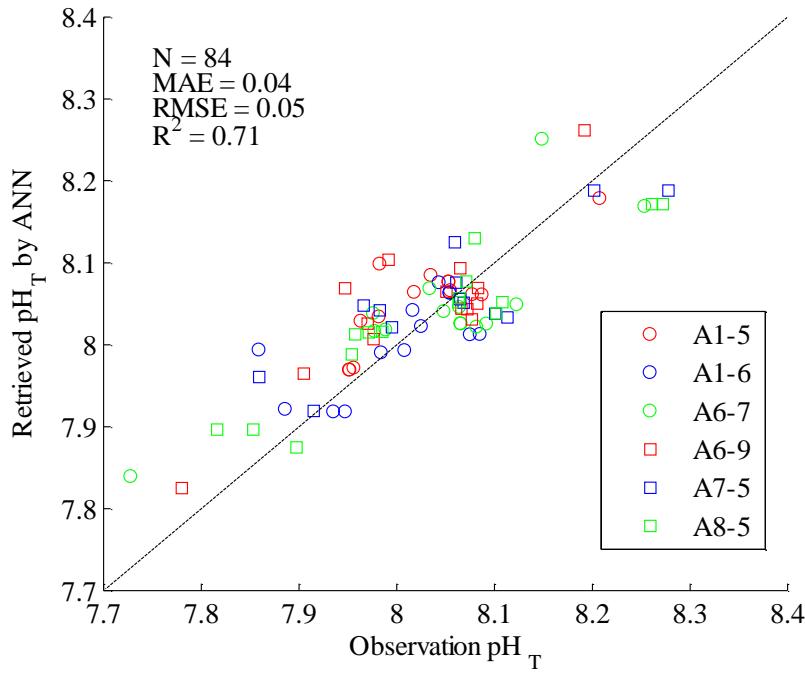

**Figure 11: Comparison of water column  $pH_T$  retrieved by the ANN model using Changjiang Biology FVCOM output with corresponding observations at six sites repeated sampling for 3 to 4 years. The 1:1 line is shown in the plot as a visual reference. Skill statistics include the mean absolute error (MAE), the coefficient of determination ( $R^2$ ), and the root mean squared error (RMSE). N represents the number of data points.**

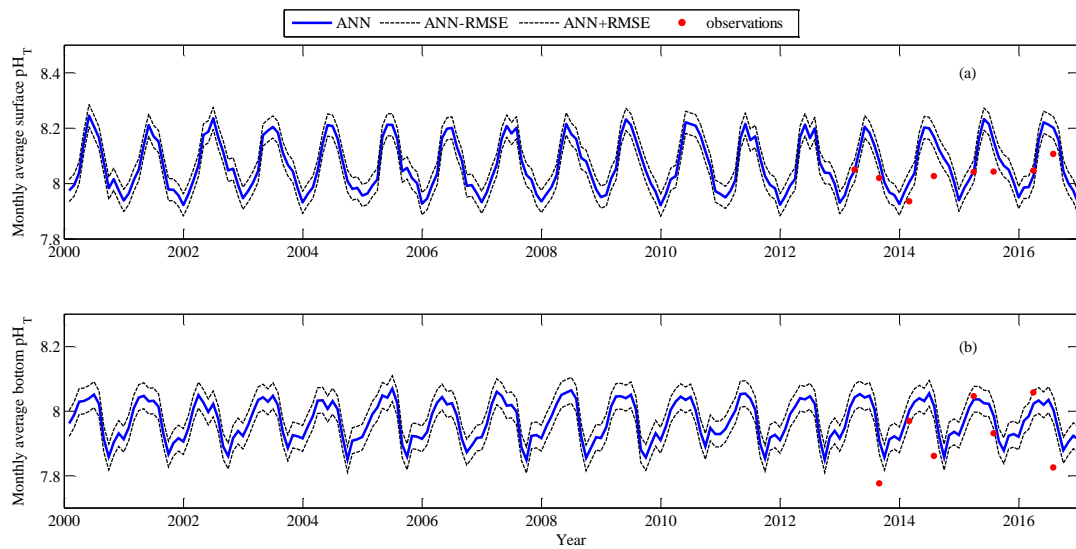

**Figure 12:** Comparison of monthly average  $pH_T$  on the East China Sea shelf. Blue solid line represents retrieved  $pH_T$  by the ANN model using Changjiang Biology FVCOM output; black dotted line represents retrieved  $pH_T \pm RMSE$ ; red points show monthly-average  $pH_T$  observations from 2013 to 2016. (a)-surface; (b)-bottom.

475

**Table 1:** Field survey information and measurements of water temperature, salinity, dissolved oxygen, nitrate, phosphate, silicate and  $pH_T$  (Mean $\pm$ SE).

| Sampling period                                    | Temperature (°C) | Salinity         | Dissolved oxygen (mmol m <sup>-3</sup> ) | Nitrate (mmol m <sup>-3</sup> ) | Phosphate (mmol m <sup>-3</sup> ) | Silicate (mmol m <sup>-3</sup> ) | $pH_T$          |
|----------------------------------------------------|------------------|------------------|------------------------------------------|---------------------------------|-----------------------------------|----------------------------------|-----------------|
| March 4 <sup>th</sup> -20 <sup>th</sup> , 2013     | 11.54 $\pm$ 1.34 | 32.04 $\pm$ 2.26 | 275.28 $\pm$ 19.30                       | 12.25 $\pm$ 8.25                | 0.58 $\pm$ 0.17                   | 17.54 $\pm$ 7.65                 | 8.19 $\pm$ 0.04 |
| August 17 <sup>th</sup> -28 <sup>th</sup> , 2013   | 23.45 $\pm$ 3.17 | 32.32 $\pm$ 2.91 | 142.22 $\pm$ 63.45                       | 12.16 $\pm$ 8.05                | 0.55 $\pm$ 0.32                   | 16.47 $\pm$ 12.18                | 8.04 $\pm$ 0.18 |
| February 21 <sup>th</sup> -28 <sup>th</sup> , 2014 | 9.56 $\pm$ 2.38  | 32.14 $\pm$ 1.78 | 293.07 $\pm$ 19.52                       | 11.92 $\pm$ 9.17                | 0.59 $\pm$ 0.18                   | 12.52 $\pm$ 6.50                 | 8.10 $\pm$ 0.04 |
| July 10 <sup>th</sup> -17 <sup>th</sup> , 2014     | 21.66 $\pm$ 2.13 | 29.50 $\pm$ 5.10 | 186.44 $\pm$ 43.29                       | 21.57 $\pm$ 22.10               | 0.57 $\pm$ 0.46                   | 21.45 $\pm$ 17.76                | 8.07 $\pm$ 0.11 |
| March 11 <sup>th</sup> -21 <sup>th</sup> , 2015    | 11.42 $\pm$ 1.44 | 31.57 $\pm$ 2.60 | 279.72 $\pm$ 15.29                       | 22.04 $\pm$ 18.88               | 0.81 $\pm$ 0.35                   | 16.48 $\pm$ 11.64                | 8.19 $\pm$ 0.03 |
| July 9 <sup>th</sup> -20 <sup>th</sup> , 2015      | 22.14 $\pm$ 1.55 | 29.73 $\pm$ 4.71 | 207.32 $\pm$ 56.12                       | 19.73 $\pm$ 18.62               | 0.60 $\pm$ 0.42                   | 20.87 $\pm$ 17.48                | 8.13 $\pm$ 0.09 |
| March 7 <sup>th</sup> -19 <sup>th</sup> , 2016     | 10.77 $\pm$ 2.02 | 30.85 $\pm$ 2.92 | 284.00 $\pm$ 31.40                       | 20.26 $\pm$ 12.80               | 0.82 $\pm$ 0.25                   | 19.17 $\pm$ 11.62                | 8.20 $\pm$ 0.05 |
| July 4 <sup>th</sup> -28 <sup>th</sup> , 2016      | 23.19 $\pm$ 3.19 | 28.17 $\pm$ 6.67 | 122.90 $\pm$ 49.97                       | 25.77 $\pm$ 23.60               | 0.63 $\pm$ 0.46                   | 28.56 $\pm$ 25.03                | 8.06 $\pm$ 0.16 |
| February 15 <sup>th</sup> -28 <sup>th</sup> , 2017 | 11.03 $\pm$ 2.57 | 32.00 $\pm$ 2.43 | 296.21 $\pm$ 21.27                       | 12.30 $\pm$ 9.13                | 0.56 $\pm$ 0.18                   | 13.09 $\pm$ 7.45                 | 8.13 $\pm$ 0.05 |
| May 12 <sup>th</sup> -24 <sup>th</sup> , 2017      | 17.71 $\pm$ 1.54 | 29.62 $\pm$ 2.79 | 171.58 $\pm$ 49.52                       | 12.60 $\pm$ 4.83                | 0.29 $\pm$ 0.24                   | 10.95 $\pm$ 4.29                 | 8.08 $\pm$ 0.13 |
| July 20 <sup>th</sup> -30 <sup>th</sup> , 2017     | 24.85 $\pm$ 3.41 | 27.70 $\pm$ 6.31 | 192.11 $\pm$ 76.55                       | 20.57 $\pm$ 23.23               | 0.42 $\pm$ 0.34                   | 19.28 $\pm$ 18.92                | 8.09 $\pm$ 0.18 |

480

**Table 2:** Different model structures and their performance in the training step. The variables (Lon (longitude), Lat (latitude), Month (month), T (temperature), S (salinity), DO (dissolved oxygen), N (nitrate), P (phosphate), Si (silicate)) marked with 1 represent the input variables. Skill statistics include the coefficient of determination ( $R^2$ ), the root mean squared error (RMSE), and the mean absolute error (MAE).

| Model | Lon | Lat | Month | T | S | DO | N | P | Si | Training data |       |       | Independent validation data |       |       |
|-------|-----|-----|-------|---|---|----|---|---|----|---------------|-------|-------|-----------------------------|-------|-------|
|       |     |     |       |   |   |    |   |   |    | $R^2$         | RMSE  | MAE   | R2                          | RMSE  | MAE   |
| 1     |     |     |       |   |   | 1  |   |   |    | 0.40          | 0.092 | 0.068 | 0.47                        | 0.076 | 0.058 |
| 2     |     |     |       | 1 |   | 1  |   |   |    | 0.62          | 0.073 | 0.053 | 0.62                        | 0.067 | 0.051 |
| 3     |     |     |       | 1 | 1 | 1  |   |   |    | 0.69          | 0.065 | 0.048 | 0.72                        | 0.060 | 0.044 |
| 4     |     |     |       | 1 | 1 | 1  | 1 |   |    | 0.76          | 0.057 | 0.044 | 0.77                        | 0.052 | 0.041 |
| 5     |     |     |       | 1 | 1 | 1  |   | 1 |    | 0.81          | 0.051 | 0.040 | 0.79                        | 0.051 | 0.040 |
| 6     |     |     |       | 1 | 1 | 1  |   |   | 1  | 0.77          | 0.056 | 0.044 | 0.79                        | 0.054 | 0.043 |
| 7     |     |     |       | 1 | 1 | 1  | 1 | 1 |    | 0.80          | 0.053 | 0.042 | 0.79                        | 0.051 | 0.041 |
| 8     |     |     |       | 1 | 1 | 1  |   | 1 | 1  | 0.81          | 0.051 | 0.040 | 0.81                        | 0.049 | 0.039 |

|    |   |   |   |   |   |   |   |   |      |       |       |      |       |       |
|----|---|---|---|---|---|---|---|---|------|-------|-------|------|-------|-------|
| 9  |   |   | 1 | 1 | 1 | 1 |   | 1 | 0.76 | 0.058 | 0.044 | 0.77 | 0.054 | 0.044 |
| 10 |   |   | 1 | 1 | 1 | 1 | 1 | 1 | 0.83 | 0.048 | 0.037 | 0.86 | 0.046 | 0.037 |
| 11 |   | 1 | 1 | 1 | 1 | 1 | 1 |   | 0.85 | 0.046 | 0.035 | 0.87 | 0.043 | 0.032 |
| 12 |   | 1 | 1 | 1 | 1 |   | 1 | 1 | 0.85 | 0.046 | 0.034 | 0.85 | 0.045 | 0.035 |
| 13 |   | 1 | 1 | 1 | 1 | 1 |   | 1 | 0.82 | 0.049 | 0.036 | 0.84 | 0.050 | 0.036 |
| 14 |   | 1 | 1 | 1 | 1 | 1 | 1 | 1 | 0.84 | 0.046 | 0.035 | 0.87 | 0.045 | 0.033 |
| 15 | 1 | 1 | 1 | 1 | 1 | 1 | 1 |   | 0.86 | 0.044 | 0.033 | 0.79 | 0.046 | 0.034 |
| 16 | 1 | 1 | 1 | 1 | 1 | 1 |   | 1 | 0.87 | 0.043 | 0.032 | 0.87 | 0.044 | 0.034 |
| 17 | 1 | 1 | 1 | 1 | 1 | 1 |   | 1 | 0.87 | 0.043 | 0.033 | 0.82 | 0.045 | 0.035 |
| 18 | 1 | 1 | 1 | 1 | 1 | 1 | 1 | 1 | 0.88 | 0.040 | 0.031 | 0.88 | 0.039 | 0.031 |
| 19 | 1 | 1 | 1 | 1 | 1 | 1 |   | 1 | 0.87 | 0.042 | 0.032 | 0.87 | 0.042 | 0.033 |
| 20 | 1 | 1 | 1 | 1 | 1 | 1 | 1 |   | 0.84 | 0.046 | 0.035 | 0.85 | 0.047 | 0.036 |
| 21 | 1 | 1 | 1 | 1 | 1 | 1 | 1 | 1 | 0.88 | 0.040 | 0.031 | 0.93 | 0.033 | 0.024 |

485

**Table 3: Model comparison between traditional empirical methods (MLR and MNR) and machine-learning based empirical methods (Decision tree, Random Forest, and SVM). The statistics was derived from confirmatory dataset (training data independent validation data) using input variables: T, S, DO, N, P, and Si. Note  $R^2$  statistics in our study was based on the calculation of coefficient of determination, therefore negative  $R^2$  could be derived if there were strong bias.**

| Model         | Kernel Function | Input variables    | RMSE  | $R^2$ | MAE   |
|---------------|-----------------|--------------------|-------|-------|-------|
| MLR           | -               | T, S, DO, N, P, Si | 0.078 | 0.56  | 0.062 |
| MNR           | -               | T, S, DO, N, P, Si | 0.060 | 0.74  | 0.047 |
| Decision Tree | Simple Tree     | T, S, DO, N, P, Si | 0.064 | 0.71  | 0.047 |
|               | Medium Tree     | T, S, DO, N, P, Si | 0.060 | 0.74  | 0.044 |
|               | Complex Tree    | T, S, DO, N, P, Si | 0.061 | 0.73  | 0.043 |
| Random Forest | Boosted Trees   | T, S, DO, N, P, Si | 0.340 | -7.51 | 0.339 |
|               | Bagged Trees    | T, S, DO, N, P, Si | 0.056 | 0.77  | 0.04  |
| SVM           | Linear          | T, S, DO, N, P, Si | 0.079 | 0.55  | 0.061 |
|               | Quadratic       | T, S, DO, N, P, Si | 0.061 | 0.73  | 0.046 |
|               | Cubic           | T, S, DO, N, P, Si | 0.060 | 0.74  | 0.043 |
|               | Fine Gaussian   | T, S, DO, N, P, Si | 0.064 | 0.70  | 0.042 |
|               | Medium Gaussian | T, S, DO, N, P, Si | 0.054 | 0.79  | 0.041 |
|               | Coarse Gaussian | T, S, DO, N, P, Si | 0.069 | 0.65  | 0.054 |

## Supplementary material

490

**Table S1: The performance of different number of neurons for two hidden layers in the training step. Three statistics are the coefficient of determination ( $R^2$ ), the root mean squared error (RMSE), and the mean absolute error (MAE).**

| Model | Number of neurons |               | Training data |       |       | Independent validation data |       |       |
|-------|-------------------|---------------|---------------|-------|-------|-----------------------------|-------|-------|
|       | first hidden      | second hidden | $R^2$         | RMSE  | MAE   | $R^2$                       | RMSE  | MAE   |
| 1     | 4                 | 4             | 0.68          | 0.071 | 0.054 | 0.67                        | 0.072 | 0.057 |
| 2     | 8                 | 4             | 0.70          | 0.070 | 0.050 | 0.67                        | 0.069 | 0.050 |
| 3     | 16                | 4             | 0.76          | 0.062 | 0.045 | 0.76                        | 0.062 | 0.045 |
| 4     | 32                | 4             | 0.74          | 0.063 | 0.046 | 0.79                        | 0.062 | 0.048 |
| 5     | 40                | 4             | 0.76          | 0.062 | 0.044 | 0.76                        | 0.061 | 0.045 |
| 6     | 64                | 4             | 0.79          | 0.058 | 0.041 | 0.78                        | 0.056 | 0.043 |
| 7     | 128               | 4             | 0.76          | 0.062 | 0.045 | 0.74                        | 0.062 | 0.044 |
| 8     | 8                 | 8             | 0.73          | 0.065 | 0.047 | 0.73                        | 0.065 | 0.048 |



|    |     |     |      |       |       |      |       |       |
|----|-----|-----|------|-------|-------|------|-------|-------|
| 9  | 16  | 8   | 0.78 | 0.059 | 0.042 | 0.78 | 0.058 | 0.044 |
| 10 | 32  | 8   | 0.78 | 0.059 | 0.042 | 0.83 | 0.053 | 0.039 |
| 11 | 40  | 8   | 0.79 | 0.059 | 0.042 | 0.77 | 0.055 | 0.040 |
| 12 | 64  | 8   | 0.77 | 0.061 | 0.044 | 0.76 | 0.059 | 0.042 |
| 13 | 128 | 8   | 0.77 | 0.060 | 0.042 | 0.79 | 0.059 | 0.043 |
| 14 | 16  | 16  | 0.79 | 0.057 | 0.041 | 0.85 | 0.054 | 0.041 |
| 15 | 32  | 16  | 0.80 | 0.057 | 0.040 | 0.69 | 0.059 | 0.043 |
| 16 | 40  | 16  | 0.82 | 0.054 | 0.039 | 0.81 | 0.053 | 0.039 |
| 17 | 64  | 16  | 0.79 | 0.059 | 0.041 | 0.76 | 0.057 | 0.040 |
| 18 | 128 | 16  | 0.79 | 0.058 | 0.040 | 0.78 | 0.059 | 0.043 |
| 19 | 32  | 32  | 0.78 | 0.059 | 0.042 | 0.75 | 0.058 | 0.039 |
| 20 | 40  | 32  | 0.79 | 0.058 | 0.041 | 0.79 | 0.055 | 0.040 |
| 21 | 64  | 32  | 0.78 | 0.059 | 0.042 | 0.83 | 0.052 | 0.040 |
| 22 | 128 | 32  | 0.79 | 0.058 | 0.041 | 0.79 | 0.056 | 0.041 |
| 23 | 40  | 40  | 0.77 | 0.060 | 0.043 | 0.77 | 0.060 | 0.044 |
| 24 | 64  | 40  | 0.79 | 0.058 | 0.042 | 0.75 | 0.060 | 0.043 |
| 25 | 128 | 40  | 0.80 | 0.057 | 0.040 | 0.78 | 0.057 | 0.042 |
| 26 | 64  | 64  | 0.78 | 0.060 | 0.042 | 0.78 | 0.057 | 0.040 |
| 27 | 128 | 64  | 0.72 | 0.068 | 0.050 | 0.65 | 0.067 | 0.048 |
| 28 | 128 | 128 | 0.72 | 0.067 | 0.049 | 0.65 | 0.072 | 0.051 |

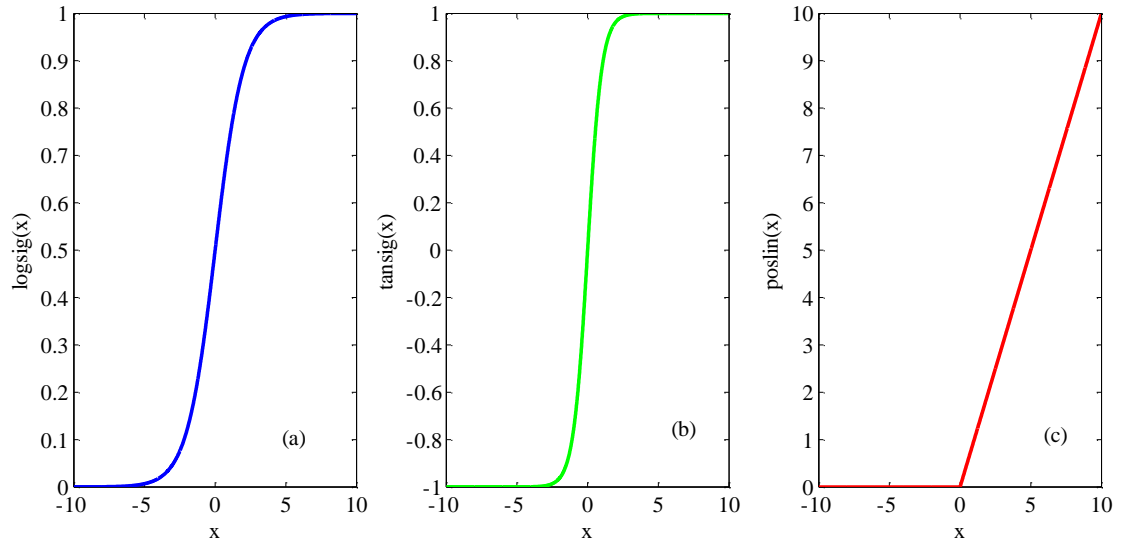

**Figure S1: Comparison of three transfer functions. (a)-Log-sigmoid transfer function (logsig); (b) Hyperbolic tangent sigmoid transfer function (tansig); (c)-Positive linear transfer function (poslin).**

495

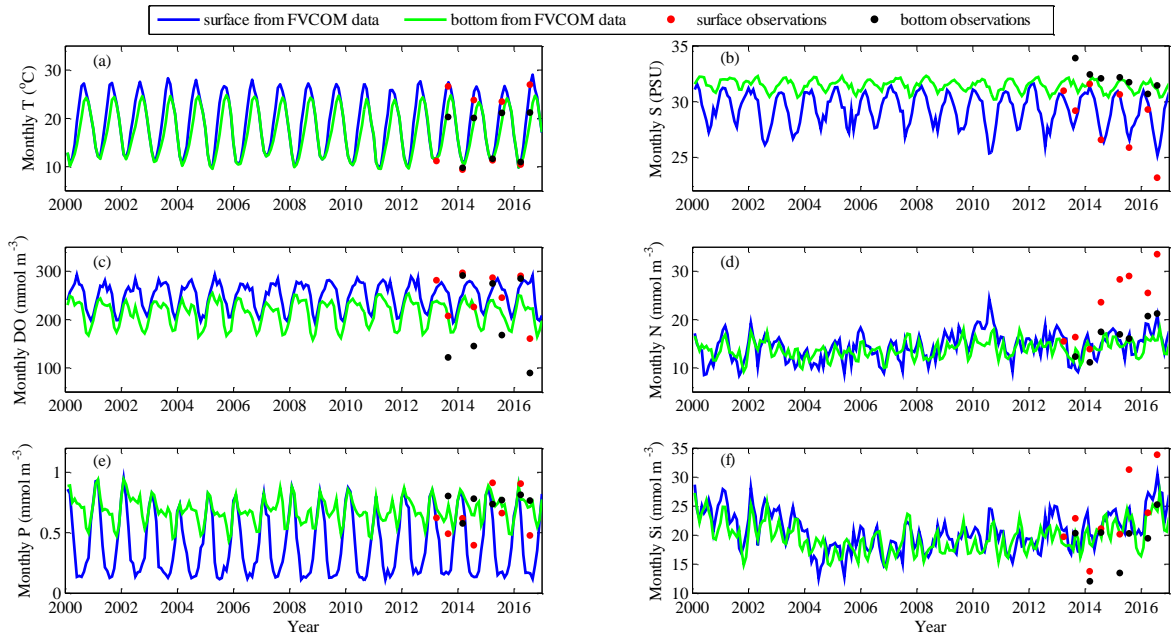

**Figure S2: Comparison of monthly-average environmental variables from the Changjiang Biology FVCOM with the corresponding observations at the surface and bottom on the East China Sea shelf. Blue and green solid lines represent surface and bottom simulated data from the Changjiang Biology FVCOM, respectively; red and black points show surface and bottom observation data from 2013 to 2016, respectively. (a)-temperature; (b)-salinity; (c)-dissolved oxygen; (d)-nitrate; (e)-phosphate; (f)-silicate.**

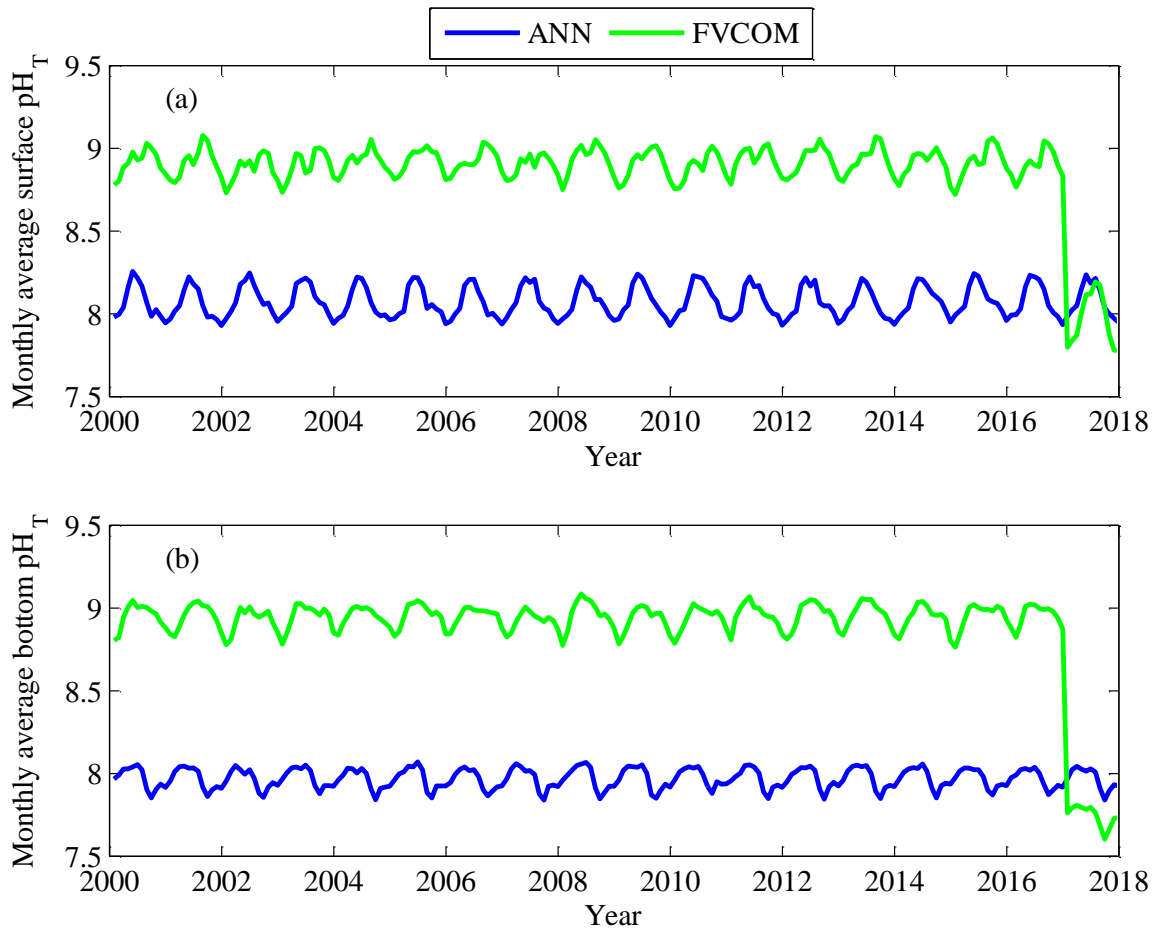

**Figure S3: Comparison of monthly average  $pH_T$  on the East China Sea shelf. Blue solid line represents retrieved  $pH_T$  by the ANN model using Changjiang Biology FVCOM output; green solid line represents simulated  $pH_T$  by the Changjiang Biology FVCOM. (a)-surface; (b)-bottom.**
